# Supplementary material for: Sequencing B cell receptors from ferrets (Mustela putorius furo)
Source: PLoS One. 2020 May 29;15(5):e0233794. doi: 10.1371/journal.pone.0233794 (PMC7259655; doi:10.1371/journal.pone.0233794)
Supplement: S1 Table — (XLSX) [file pone.0233794.s001.xlsx]

## Sheet: Heavy Variable
Heavy Variable
I-HV1	CAGGTGCAGCTGGTGCAATCTGAGGCTGAGGTAAGGAAGCCTGGGGAATCCGTGAAGGTCTCCTGCAAGGCATCTGGGTACACCTTCACCAGCTATGCAATGAACTGGGTGCAACAGGCACCAGGAAAGAGCCTGCAGTACATGGGATGGATCGACACTAACACTGGGAAACCAACATATGCCCCGGGCTTCTCCGGTCGATTTGTTTTCTCCACGGACACCTCTGTCAGCACAGCCTATCTACAGATGAACAGCCTGAACTCTGAGGACACGGCCGTGTATTACTGT
I-HV2	CAGGTCCATCTGTTACAGTCTGGGGCTGAGGTGAGGAATCCTGGAGCATCTGTGAAGGTCTCCTGCAAGGCATCTGGATACACATTCACTGACTACTATATGCACTGGGTGCGACAGGCCCCAGAACGAGGGCTTGAGTGGATGGGACGAATTGACCCTGAAGATGGTGCCACAAATATTGCACAGAAATTCCAGGCTAGAGTCACGCTTATGGCAGACACATCCACAAGCATGGCCTACATGGAACTGAGAAGTCTGAGGTCTGAGGACACGGCTTTGTATTACTGT
I-HV3	CAGGTCCATCTGTTACAGTCTGGGGCAGAGGTGAGGAATCCTGGAGCATCTGTGAAGGTCTCCTGCAAGGCATCTGGATACACATTCACTAACTACTATATGCACTGGGTGCAACAGGCCCCAGAACGAGGGCTTGAGTGGATGGGACAAATTGACCCTGAAGATGGTGCCACAAATATTGCACAGAAATACCAGGCTAGAGTCACGCTTATGGCAGACACATCCACAAACATGGCCTACATGGAACTGAGAAGTCTGAGGCCTGAGGACACGGCTTTGTATTACTGT
II-HV1	CAACTTACACTTCAGGAGTCAGGCCCAGGACTGGTGAAGCCCTCACAGACCCTCTCTCTCACATGTGTTGTCTCCGGGGGCTCCGTCACCAGCAGTTACTATTGGAACTGGATCCGCCAGCGCCCTGGAAAAGCCCTGGAGTGGATGGGCTACTGGACGGGTAGTACAAGGTACAACCCGGCTTTCCAGGGCCGCATCTCCATCACTGCTGACACATCCAAGAACCAGTTCTCCCTGCAGCTGAGTTCCATGACCACTGAGGACACGGCCGTGTATTACTGT
III-HV1	GAGGTGCAGCTGGTGGAGTCTGGGGGAGACCTGGTGAAGCCTGGAGGGTCTCTGAGACTTTCCTGTACAGCCTCTGGATTCACCTTCAGCAGCTACAGCATGCAATGGGTCCGCCAGGCTCCAGGGAAGGGGCTGCAGTGGGTCGCATATATACGCTATGATGGAGGTAGCACAAGCTACGCAGACTCTGTGAAGGGCCGATTCACCATCTCCAGAGACAACGGCAAGAACACGCTGTACCTGCAGATGAACAGCCTGAGAGCCGAGGACACGGCCCTGTATTACTGT
III-HV2	GAGATGCAGTTGGTGGAGTCTGGGGGAGACTTGGTGAAGCCTGGGGGTTCTCTGAGACTCTCCTGTGAAGCCTCTGGTTTCACCTTCAGTGGCTATGGAATGAGCTGGGTCCGCCAGGCACCAGGAAAGCGGATAGAGTTGGTCTCAAATATTGATGCTGGTGGAGGTAGCACAAGCTACACAGACTCTGTGAAGGGCCGATTCACCATCTCCAGAGACAATGCAAAGAACACGCTGTATCTGCAGATGAACAGCCTGAGAACCGAGGACACAGCCATGTATTTCTGT
III-HV3	GAGATGAAGCTAGTGGAGTCTGGGGGAGACCTGGTGAAGCCTGGAGGGTCCCTGAGACTCTCCTGTGTAGCCTCTGGATTCACCTTCAGTAGCTATGGCATGACCTGGGTCTGCCAGGATCCAGGGAAGGGGCCGCAGTGGGTTGCAGGTATTTGGATTGATGGAAGTTTCACAAGCTATGTAGACTCTGTGAAGGGCCAATTCACCATCTCCAGAGACAATGGCAAGAACACGCTGTATCTTCAGATGAACAGCCTGAGATCCAATGACATGGACGTGTATTATTGT
III-HV4	GAGATGCAGCTGGTGGAGTCTGGGGGAGACCTGGTGAAGCCTGAAGGGTCCCTGAGACTCTCCTGTGCAGCCTCTGGATTCACCTTCAGTAGCTACGGCATGAGCTGGGTCCGCCAGGCTCCAGGGAATGGGCTGCAGTGGGTCGCAGGTATTAGCTATGATGGAAGTAGCACATACTACGCAGACTCTGTAAAGGGCCGATTCACCATCTCCAGAGACAACGGCAAGAACACGCTGTATCTTCAGATGAACAGCCTGAGAGCCGAGGACACGGCCGTGTATTACTGT
III-HV5	GAGGTGCAGCTGGTGGAGTCTGGGGGAGACCTGTTGAAGCCTGGGGGTTCCCTGAGACTCTCCTGTGCAGCCTCTGGATTCACCTTCAGTAGCTATGGCATGAGCTGGGTCCACCAGGCCCCAGGGAAGGGGCTGCAGTGGGTCGCAGATATTAGCAAGGGTGGTAGTTACACATACTACACAGACTCTGTGAAGGGCCGATTCACCATCTCCAGAGACAATGGCAAGAACATGCTGTATCTGCAGATGAACAGCCTGAGAGCTGAGGACACGGCCGTGTATTACTGTGC
III-HV6	GAGGTGCAGCTGGTGGAGTCTGGGGGAGACCTGGTGAAGCCTGGGGGGTCCCTGAGACTTTCCTGTGCAGCCTCTGGATTCATCTTCAGTAGCTACTGGATGAGATGGGTCCGCCAGGCTCCAGGGAAGGGGCTGAAGTGGGTCACAAGTATTAGCAATACTGGTAGTAACACATACTATGCAGACTCTGTGAAGGGCCGATTCACCATCTCCAGAGACAATGGCAAGAACACGCTGTATCTGCAGATGAACAGCCTGAGAGCTGAGGACACGGCCGTGTATTATTGT
III-HV7	GAGGTGCAGTTGGTGGAGTCTGGGGGAGACCTGGTGAAGCCTGGGGGGTCCCTGAGACTCTCCTGTGCAGCCTCTGGATTCACCTTCAGTAACTATGCCATGAGCTGGGTCCGCCAGGCTCCAGGGAAGGGGCTGCAGTGGGTCACAAGTATTAGCAATACTGGTAGTAACACATACTATGCAGACTCTGTGAAGGGCCGATTCACCATCTCCAGAGACAATGGCAAGAACATGCTGTATCTTCAGATGAATAGCCTGAAAGCCGAGGACACAGCCGTTTATTACTGT
III-HV8	GAGGTGAAGCTTGTGGAATCTGGGGGAGACCTGGTGAAGCCTGGGGGGTCCCTGAGACTCTCGTGTGCAGCCTCTGGATTCACCTTCAGTAACTATGACATGAACTGGGTCCGCCAGGCTCCAGGAAAGGGACTGCAGTGGGTCGCATACATTAGCAGTGGTGGAAGTAGCACATACTATGCAGACTCTGTGAAGGGCCGATTCACCATCTCCAGAGACAACGACAAGGACATGCTGTATCTGCAGATGAACAGCCTGAGAGCAGAGGACACGGCCATGTATTATTGT
III-HV9	GAGGTGCAGCTGGTGGAGTCTGGGGGAGACCTGGTGAAGCCTGGGGGGTCTCTGAGACTCTCCTGTGCAGCCTCTGGATTCACCATCAGTAACAATGAAATGAACTGGGTCCGCCAGGCTCCAGGGATGGGGCTGCAGTGGGTCGCATATATTAACAGTGTTGGAAGCACATACTATGCAGACTCTGTGAAGGGCCGATTCACCATCTCCAGAGACAACAGCAAGAACACGCTGCATCTGCATATGAGCAACCTGAATGCTGAGGACACGGCTGTGTATTACTGT
III-HV10	GAGGTGCAGCTGGTGGAGTCTGGGGGTGACCTGGTGAAGCCTGGGGGGTCCCTGAGACTCTCCTGTGCAGCTTCTGGATTCACCTTCAGTAACTACGGCATGAGCCGGGTCCGCCAGGCTCCAGGGAAGGGGCTGCAGTGGGTCGCATGGATTAGCAGTAGAAGTAGTTACACATACTACACAGACTCTGTGAAGGGCCAATTCACCATCTCCAGAGACAACAGCAAGAACACGCTGTATCTGCAGATGAGCAGCCTGAGAGCCGAGGACACGGCTGTATATTACTGT
III-HV11	GAGGTGCAGCTGGTGGAGTCTGGGGGAGACCTGGCGAAGCCTGGGGGGTCCCTGAGACTCTCCTGTGCAGCCTCTGGATTCACCTTCAGTAACTATGGCATGAGCTGGGTCAGGCAGACTCCAGGGAAGGGGCTGCAGTGGGTCGCATATATTAGCACTAGTAGTAGTTACACATACTATGCAGACTCTGTGAAGGGCCAATTCACTGTCTCCAGAGACAATGGGAAGAACACGCTGTATCTGCAGATGAGCAGCCTGAGAGCTGAGGACACGGCCGTGTATTACTGT
III-HV12	GAGGTGCAGCTGGTGGAGTCTGGGGGAGACCTGGTGAAGCCTGAGGGGTCCCTGAGACTCTCCTGTGCAGCCTCTGGATTCACCTTCAGCAACTACTACATGTACTGGGTCCGCCAGGCTCCAGGGAAGGGGCTGCAGTGGGTCGCAGAAATTAGCAATACTGGTAGTAGCACATACTACACAGACTCTGTGAAGGGCCGATTCACCATCTCCAGAGACAACGGCAAGAATACACTTTATCTTCAGATGAACAGCCTGAGAGCTGAGGACACAGCCATGTATTACTGT
III-HV13	GTGGTGCAGCTGGTGGAGTCTGGGGGAGACCTGGTGAAGCCTAGGGGTTCCCTGAGACTCTCCTGTGCAGCCTCTGGATTCACCTTCAGCAACTACCACATGGACTGGGTCCACCAGGCTCCAGGGAAGGGGCTGCAGTGGGTCGCAGAAATTAGCAATACTGGTAGTAGCACAAACTACGCAGACTCTGTGAAAGGCCAAATCACCATCTCCAGAGACAACGGCAAGAACACACTGTATCTGCAGATGAACAGCCTGAGAGTCGAGGACACAGCCGTGTATTACTGT
III-HV14	GAGGTGCAGCTGGTGGAGTCTGGGGAAGACCTGGTGAAGCCTGGGGGATCCCTGAGACTCTCCTGTGCAGCCTCTGGATTCACCTTCAGCAACTACTACATGGACTGGGTCCGCCAGGCTCCAGGGAAGGGGCTGCAGTGGGTCGCAGATATTAGCGGTGGTGGAAGTAGCACAAGCTACGCAGACTCTGTGAAGGGCCGATTCACCATCTCCAGAGACAATGGCAAGAATATGCTGTATCTGCAGATGAATAGCCTGAGAGCAGAGGACACGACCCTGTATTACTGT
III-HV15	GAGGTGCAGCTGGTGGAGTCTGGGGGTGACCTGGTGAAGCCTGGGGGGTCCCTGAGACTCTCCTGTGCAGCCTCTGGATTCACCTTCAGCAACTACTACATGGAACGGGTCCGCCAGGCTCCAGGGAAGGGACTGCAGTGGGTCGCAGGTATTAGCAGGGATGGAAGTAGCACAAGCTATGCAGACTCTGTGAAGGGCCGATTCACCATCTCCAGAGACAACGGCAAGAACACACTGTACCTGCAGATTAACAGCCTGAGAAGTGAGGACACGGCCATGTATTACTGT
III-HV16	GAGGTGCAGCTGGTGGAGTCTGGGGGAGACCTGGTGAAGCCTGGGGGGTCCCTGAGACTCTCCTGTGCAGCCTCTGGATTCACCTTCAGCAACTACTACATGTACTGGGTCCGCCAGGCACCAGGGAAGGGGCTGCAGTGGGTCGCAGGTATTAGCAGGGATGGAAGTAGCACAAGCTATGCAGACTCTGTGAAGGGCCGATTCACCATCTCCAGAGACAATGGCAAGAACACACTGTACCTGCAGATTAACAGCCTGAGAAGTGAGGACACGGCTGTGTATTACTGT
III-HV17a	GAGGTGCAGCTGGTGGAGTCTGGGGGTGACCTGGTGAAGCCTGGGGGGTCCCTGAGACTCTCCTGTGCAGCCTCTGGATTCACCTTCAGTAGCTACGACATGTACTGGGTCCGCCAGGCTCCAGGGAAGGGGCTGCAGTGTGTCGCATGGATTAATACTGGTGGAAGTAGCACAAGCTACGCAGACTCTGTGAAGGGTCGATTCACCATCTCCAGAGACAACGGCAAGAACACGCTGTATCTGCAGATGAACAGCCTGAGAGCCGAGGACACGGCCATGTATTACTGT
III-HV17b	GAGGTGCAGCTGGTGGAGTCTGGGGGTGACCTGGTGAAGCCTGGGGGGTCCCTGAGACTCTCCTGTGCAGCCTCTGGATTCACCTTCAGTAGCTACGACATGTACTGGGTCCGCCAGGCTCCAGGGAAGGGGCTGCAGTGTGTCGCATGGATTAATACTGGTGGAAGTAGCACAAGCTACGCAGACTCTGTGAAGGGTCGATTCACCATCTCCAGAGACAACGACAAGAACACGCTGTATCTGCAGATGAACAGCCTGAGAGTCGAGGACACGGCCATGTATTACTGT
III-HV17c	GAGGTGCAGCTGGTGGAGTCTGGGGGTGACCTGGTGAAGCCTGGGGGGTCCCTGAGACTCTCCTGTGCAGCCTCTGGATTCACCTTCAGTAGCTACGACATGTACTGGGTCCGCCAGGCTCCAGGGAAGGGGCTGCAGTGTGTCGCATGGATTAATACTGGTGGAAGTAGCACAAGCTACGCAGACTCTGTGAAGGGTCGATTCACCATCTCCAGAGACAACGGCAAGAACACGCTGTATCTGCAGATGAACAGCCTGAGAGTCGAGGACACGGCCATGTATTACTGT
III-HV18a	GAGGTGCAGCTGGTGGAGTCTGGGGGAGACCTGGTGAAGCCTGGGGGGTCCCTGAGACTCTCCTGTGCAGCCTCTGGATTCACCTTCAGCAACTACTACATGGACTGGGTCCGCCAGGCACCAGGGAAGGGGCTGCAGTGGGTCGCACGTATTAGCAGTGATGGAAGTAGCACATACTACGCAGACTCTGTGAAGGGCCGATTCGCCATCTCCAGAGACAACGGCAAGAACACGCTGTATCTGCAGATGAACAGCCTGAGAACTGAGGACACGGCCGTGTATTACTGT
III-HV18b	GAGGTGCAGCTGGTGGAGTCTGGGGGAGACCTGGTGAAGCCTGGGGGGTCCCTGAGACTCTCCTGTGCAGCCTCTGGATTCACCTTCAGCAACTACTACATGGACTGGGTCCGCCAGGCACCAGGGAAGGGGCTGCAGTGGGTCGCACGTATTAGCAGTGATGGAAGTAGCACATACTACGCAGACTCTGTGAAGGGCCGATTCGCCATCTCCAGAGACAACGGCAAGAACACGCTGTATCTGCAGATGAACAGCCTGAGAACTGAGGACACGGCCGTGTTTTACTGT
III-HV19a	GAGGTGCAGCTGGTGGAGTCTGGGGGTGACCTGGTGAAGCCTGGGGGGTCCCTGAGACTCTCCTGTGCAGCCTCTGGATTCACCTTCAGCAACTACTACATGAGCTGGGTCCGCCAGGCTCCAGGGAAGGGGCTGCAGTGGGTCGCATGGATTAATACTGGTGGAAGTAGCACATACTACGCAGACTCTGTGAAGGGCCGATTCACCATCTCCAGAGACAATGGCAAGAACACGCTGTATCTGCAGATGAACAGCCTGAGAGCCGAGGACACGGCCATGTATTACTGT
III-HV19b	GAGGTGCAGCTGGTGGAGTCTGGGGGTGACCTGGTGAAGCCTGGGGGGTCCCTGAGACTTTCCTGTGCAGCCTCTGGATTCACCTTCAGCAACTACTACATGAGCTGGGTCCGCCAGGCTCCAGGGAAGGGGCTGCAGTGGGTCGCATGGATTAATACTGGTGGAAGTAGCACATACTACGCAGACTCTGTGAAGGGCCGATTCACCATCTCCAGAGACAATGGCAAGAACACGCTGTATCTGCAGATGAACAGCCTGAGAGCCGAGGACACGGCCATGTATTACTGT
III-HV20	GAGGTGCAGCTGGTGGAGTCTGGGGGAGACCTGGTGAAGCCTGGGGGGTCCCTGAGACTCTCCTGTGCAGCCTCTGGATTCACCTTCAGCAACTACTACATGAGCTGGGTCCGCCAGGCTCCAGGGAAGGGGCTGCAGTGGGTCGCATATATTAGCAGTGATGGAAGTAGCACAAGCTACGCAGACTCTGTGAAGGGCCGATTCACCATCTCCAGAGACAATGGCAAGAACACGCTGTATCTGCAGATGAACAGCCTGAGAGCCGAGGACACGGCCATGTATTACTGT
III-HV21	GAGGTGCAGCTGGTGGAGTCTGGGGGAGACCTGGTGAAGCCTGGGGGGTCTCTGAGACTCTCCTGTGCAGCCTCTGGATTCACCTTCAGTAGCTATGGCATGCACTGGGTCCACCAGGCTCCAGGGAAGGGACTGCAGTGGGTCGCAGGTATTAGCAATGACGGAAGTGGCACATACTACGCGGACTCTGTGAAGGGCCGATTCACCATCTCCAGAGACAATGGCAAGAACACGCTGTATCTGCAGATGAACAGCCTGAGAGCCGAGGACACGGCCGTGTACTACTGT

## Sheet: Kappa Variable
Kappa Variable
III-KV1	GACATTGTGCTGACCCAGTCTCCAGCCTCTTTGACTATGTCTCCAGGGCAGAGGACCACCATCTCTTGCAAGACCAGTCAGGAAGTCAGTGACATTTTGGGCATTACACACTGTATTACATGGTATCAACAAAAATCAGGACAGTGTCCGAGAATCCTGATTTATAAAGCATCTAGTGGAGTGTGTGGGGTCCCGGTCCGGTTCAATGGTGGTAGGTCTGGGACGGAATTCAGTCTCACGACTGGTCTGGTGGAGGATGGGGATGCTGCCAGTTATTACTGC
III-KV2	GACATTGTGCTGACCCAGTCTCCAGCCTCTTTGACTGTGTCTCCAGGGCAGAGGGCCACCATCTCTTGTAAGACCAGTCAGAACGTTGGTGACATTTGGGGCATGACACACTATATTACATGGTATCAACAAAAATCAGGACAGCGTCCAAGAATGCTGATTTATAAAGCATCCAGTCAAGCATCTGGGGCCCCGGCCCGCTTCAGTGGCAGTGGGTCTGGGACTGAATTCAGTCTCACAATTGATCCCGTGGAGGATGGGGATGCTGCCAACTATTACTGC
II-KV1	GACATCGTGATGACCCAGTCTCCAGCCTCCCTGAACGGGTCTCCAGGAGAACGCATTGCCATGAACTGCAAGTCTAGCCAGAGTCTTCTATACAGCTCCAACCAGAAGAACTACTTAGCTTGGTACCAGCAGAAGCCAGGGCAGGCTCCTAAGCTACTCATCATCTGGGCATCCACCCGGGCATCTGGGGTTCCCGACCGGTTCAGCGGCAGTGGGTCTGGGACAGACTTCACCCTCACCATCAGCAACCTCCAGGCTGAAGATGTGGGGGACTATTACTGC
II-KV2	GAAATCACGATGACTCAGTCTCCAGGCTCCCTGGCTGTGTCTCCAGGTCAACGGGTCACCCTGAACTGCAAAGCCAGTCAGAGTGTTAGCAACTATGTAAACTGGTACCAGCAGAAACCTGGGCAGTCTCCCAGGCTCCTCATCTATGATGCATCCAGCAGGGCCACGGGCATCCCAGACCGGTTCAGTGGCAGTGGGTCTGGGACAGACTTCACCCTCACCATCAGCAACCTCCAGGCCGAAGATGTGGGAAGCTATTACTGC
II-KV3	GATATCACGATGACTCAGTCTCCAGGCTCCCTGGCTGTGTCTCCAGGTCAGCGGGTCACCATAAACTGCAGAGCCAGTCAGAGTGTTAGCAACTATGTAGCCTGGTACCAGCAGAAACCTGGGCAGTCTCCCAGGCTCCTCATCTATTATGCATCCAGCAGGGCCACGGGTATCCCAGACCGGTTCAGCGGCAGTGGGTCTGGGACAGACTTCACCCTCAGCATCAGCAACCTCCAGGCCGAAGATGTGGGGGACTATTACTGC
II-KV4	GACATCACGATGACTCAGTCTCCAGGCTCGCTGGCTGTGTCTCCAGGTCAACGGATCACCATGAACTGCAGAGCCAGTCAGAGTGTTAGCAACTATGTAGCCTGGTACCAGCAGAAACCTGGGCAGGCTCCCAGGCTCCTCATCTATTATGCATCCAGCAGGGCCACGGGGATCCCAGACCGGTTCAGTGGCAGTGGGTCTGGGACAGACTTCACCCTCACCATCAGCAACCTCCAGGCTGAAGATGTGGGAAACTATTACTGCC
II-KV5	GACATCACGATGACTCAGTCTCCAGGCTCCCTGGCTGTGTCTCCAGGTCAGCGGGTCACCCTGAACTGCAGAGCCAGTCAAAGTGTTAGCAACTATGTAGCCTGGTACCAGCAGAAACCTGGGCAGTCTCCCAGGCTCCTCATCTATTATGCATCCAGCAGGGCCACGGGTATCCCAGACCGGTTCAGCGGCAGTGGGTCTGGGACAGACTTCACCCTCACCATCAGCAACCTCCAGGCCGAAGATGTGGGAAACTATTACTGT
II-KV6	GACATCACAATGACTCAGTCTCCAGGCTCCCTGGCTGTGTCTCCAGGTCAGCGGGTCACCATGAACTGCAGAGCCAGTCAGAGTGTTAGCAACTATGTAGCCTGGTACCAGCAGAAACCTGGGCAGGCTCCCAGGCTCCTCATCTATGCTGCATCCAGCAGGGCCACGGGCATACCAGACCGGTTCAGCGGCAGTGGGTCTGGGACAGACTTCACCTTCAGCATCAGCAACCTCCAGGCCGAAGATGTGGGGGACTATTACTGT
II-KV7	GACATCATGATGACTCAGTCTCCAGGCTCCCTGGCTGTGTCTCCAGGTCAGCGGGTCACCCTGAACTGCAGAGCCAGTCAGAGTGTTAGCAACTATGTAGCCTGGCACCAGCAGAAACCTGGGCAGGCTCCCAGGCTCCTCATCTATCGTGCATCCAACAGGGCCACGGACATCCCAGGCCGTTTCAGCGGCAGTGGGTCTGGGACAGACTTCACCCTCACCATCAGCAACCTCCAGGCCGAAGATGTGGGAAACTATTACTGC
II-KV8	GACATCACGATGACTCAGTCTCCAGGCTCCCTGGCTGTGTCTCCAGGTCAGCGGGTCACCATGAACTGCAGAGCCAGTCAGAGTGTTAGCAAATATGTAGCCTGGTACCAGCAGAAACCTGGGCAGGCTCCCAGGCTCCTCATCTATGATGCATCCAGCAGGGCCACGGGCATCCCAGACCGGTTCAGTGGCAGTGGGTCTGGGACAGACTTCACCCTCACCATCAGCAACCTCCAGGCCGAAGATGTGGGAAGCTATTATTGC
II-KV9	GACATCACGATGACTCAGTCTCCAGGCTCATTGGCTGTGTCTCCAGGTCAGCGGGTCACCATGAACTGCAGAGCCAGTCAGAGTGTTAACAACTATGTAGCCTGGTACCAACAGAAACCTGGGCAGGCTCCCAGGCGCCTCATCTATGCTGCATCCAGCAGGGACACGGGCATCCCAGACCGGTTCAGCGGCAGTGGGTCTGGGACAGACTACACCCTCACCATCAGCAACATCCAGGCTGAAGATGTGGGAAGCTACTACTGC
II-KV10	GACATCACGATGACTCAGTCTCCAGGCTCGCTGGCTGTGTCTCCAGGTCAGCGGGTCACCATGAACTGCAGAGCCAGTCAGGGTGTTTATAGCAATGTAGCCTGGTACCAGCAGAAACCTGGGCAGGCTCCCAGGCTCCTCATCTATGATGCATCCAGCAGGGACACGGGCATCCCAGACCGGTTCAGTGGCAGTGGGTCTGGGACAGACTACACCCTCACCATCAGCAACCTCCAGGCTGAAGATGTGGGAAACTATTACTGC
II-KV11	GACGTCACGATGACTCAGTCTCCAGGCTCACTGGCTGTGTCTCCAGGTCAGCGGGTCACCATGAACTGCAGAGCCAGTCAGGGTGTTTACAACAATGTAGCATGGTACCAGCAGAAACCTGGGCAGGCTCCCAGGCTCCTCATCTATGATGCATCCAGCAGGGCCACGGGCATCCCAGACCGGTTCAGCGGCAGTGGGTCTGGGACAGACTTCACCCTCACCATCAGCAACCTCCAGGCTGAAGATGTGGGGGACTATTACTGC
II-KV12	GACATCACGATGACTCAGTCTCCAGGCTCTCTGGCTGTGTCTCTAGGTCAACGGGTCACCATGAATTGCAGAGCCAGTCAGAATATTTACAGCAACGTAAACTGGTACCAGCAGAAACCTGGGCAGGCTCCCAGGCTCCTCATCTATGCTGCATCCAGCAGGGCCACGGGCATCCCAGGCCGGTTCAGCGGCAGTGGGTCTGGGACAGACTTCACCCTCACCATCAGCAACCTCCAGGCCGAAGATGTGGGGGACTATTACTGC
II-KV13	CACACGGAGCTGACCCAGTCTCCAGCCTTCCTCTCCGTGTCCCTGGGAGACAGCGTGTCCATCACCTGCAGGGTCAACGAGAGCGTCAGCGATTACTTGAGCTGGTATCAGCAGAAACCAGGCCAGGCTCCTAAGCATCTCATCTATGATGCTGATAACCTCAAGTCTGGTGTCCCAGCCCGGTTCTCTGCGATTCAGTCGGACAAAGAATTCACCCTCAAAATCAGCGCAGTAGAGGCTGAGGATGCTGCCAGTTATTACTGC
II-KV14	CACACGGGGCTGACCCAGTCTCCGGCCTTCCTCTCGGTGTCCCTCAGAGAGGGAGTGTCCATCACCTGCAGGGCTAAAGAGAGTGTCAGCGATTACTTGAGCTGGTATCAGCAGAAACCAGGCCAGGATCCTCAGCTTCTCATCTATGATGCTGATAACCTCAAGTCTGGAGTCCCAGACCGGTTCTCTGTGATTCAGTTGGACAGAGAATTCATCCTCAATATCAGCTCAGTAGAGGCTGAGGATGCTGCCAGTTATTACTGC
II-KV15	CACGTGGGGCTGACCCAGTCTCCGGCCTTCCTCCAGGTGTCCCTGAGAGAGGGCGTGTCCATCACCTGCAGGGCCAACGAGAGCGTCAGCGATTACTTGAGCTGGTATCAGCAGAAACCAGGCCAGGCTCCTCAGCTTCTCATCTATGATGCTGATAACCTCAAGTCTGGAGTCCCAGACCGGTTCTCTGCGATTCAATCGGACAAAGAATTCATCCTCAAGATCAGCGCAGTAGAGGCTGAGGATGCTGCCAGTTATTACTGC
II-KV16	GATATTGTGCTGACACAGACCCCACGGTCCCTGTCCCTCACCCCTGGAGAGCCGGCCTCCATCTCCTGCAGGGCCAGTCAGAGCCTCCTGCACAGAGATGGAAACACCTATTTGTATTGGTATCTGCAGAAACCAGGCCAGTCCCCACAGCTCCTGATCTATGAGGTTTCCATCCATAAATCTGGGGTCCCAGACAAGTTCAGTGGCAGCAGGTCAGGGACAGATTTCACCCTGAAACTCAGCAGGGTGGAGGATGGCGATGTGGGAGTTTATTACTGC
II-KV17	GATATCATGCTGACACAGACCCCACTGTCCCTGTCCATCACCCCCAGAGAGCTGGCCTCCATCTCCTGCAGGGCCAGTCAGAGCCTCCTGCACAGAGATGGAAACACCTATTTGTATTGGTACCTGCAGAAACCAGGCCAGTCCCCACAGCTCCTGATCTATGAGGTTTCCATCCATAAATCTGGGGTCCCAGACAGGTTCAGTGGCAGTGGGTCAGGGACAGATTTCACCCTGAGAATCAGCAAGGTGGAGGATGACGATGTGGGAGTTTATTACTGC
II-KV18	GATATTGTGATGACACAGACCCCACTCTCACTGTCGGTTACTCCTGGAAAGCCGGTTTCCATCTCCTGCAGGGCCAGTCAGAGCCTCCTGCACAGTAATGGAATGAACTATTTGTATTGGTACCTGCAGAAGCCAGGCCAGTCTCCACAGAGCCTGATCTACTTGGCCTCCAGCCGTTACCCTGGGGTTCCAGACAGGTTCAGTGGCAGGGGGTCAGGGACAGATTTCACCCTGACTATCAGCAGTGTGGAGGCTGAGGATGTGGGAGTTTATTACTGC
II-KV19	GAAATTGTATTGACACAGACCCCACTGTCCCTGTCTGTCAGTTCTAGAGAGCCGGCTTCCATCTCCTGCCGGGCCAGTCAGAGCCTCCTGCACAGTAATGGAAACAATTATTTGCATTGGTACCTGCAGAAGCCAGGCCAGTCTCCACAGCTTCTGATCTTCTTTGCCACTAACCGTTTCAGTGGGGTCCCAGACAGGTTCAGTGGCAGCGGGTCAGGGACAGATTTCACCCTGAGGATCAGCAGGGTGGAGGCTGACGATGTGGGGGTTTATTACTGT
II-KV20	GAAGTTGTATTGACACAGACCCCACTGTCCCTGTCCGTCACTCTGGGAGAGCCGGCTTCCATCTCTTGCCGGGCCAGTCAGAGCCTCCTGCACAGTACTAGATACAATTTTTTGCATTGGTACCTGCAGAAGCCAGGCCAGTCTCCACAGCTTCTGATCTACTTGGCCACTAACCGTTTCACTGGGGTCCCAGACAGGTTCAGTGGCAGCGGGTCAGGGACAGATTTCACCCTGAGGATCAGCAGGGTGGAGGCTGACGATGTGGGGGTCTATTACTGT
II-KV21	GAAGTTGTATTGACACAGAACCCACTGTCCCTGTCCATCACTCTGGGAGAGCCGGCTTCCATCTCCTGCCGGGCCAGTCAGAGCCTCCTGCACAGTAATAGATACAATTACTTGCATTGGTACCTGCAGAAGCCAGGCCAGTCTCCACAGCTTCTGATCTACTTGGCCACTAACCGTTTCAGTGGGGTCCCAGACAGGTTCAGTGGCAGCGGGTCAGGGACAGATTTCACCCTGAGGATCAGCAGGGTGGAGGCTGACGATGTGGGGGTTTATTACTGT
II-KV22	GAAATCGTGATGACACAGACCCCGCTGTCACTGTCCGTCACCCCCGGAGAGCCGGCCTCCATCTCCTGCAGGGCTAGTCAGAGCCTCCTACATAGTGATGGAAACACCTATTTAAATTGGTACCGGCAGAAGCCAGGCCAGTCCCCACAGCTCCTCATCTACTTGGTTTCCAACCGTTTCACTGGAGTCCCAGACAGGTTCAGTGGCAGCGGGTCAGGGACAGATTTCACGTTGAGGATCAGCAGGGTGGAGGCTGACGATATGGGAGTTTATTACTGC
II-KV23	GAAATCATGATGACACAGACCCCACTGTCCCTGTCTGTCACCCCCGGAGAGCCGGCCTCCATCTCCTGCAGGGCCAGTCAGAGCCTCGTACACAGTAATGGAAACACCTATTTGAGTTGGTTCCGGCAGAAGCCAGGCCAGTCCCCACAGGGCCTGATCTACAAGGTTTCCAACCGTTTCACTGGGGTCCCAGACAGGTTCAGTGGCAGCGGGTCAGGGACAGATTTCACGCTGAGAATCAGCAGGGTGGAGGCTGACGATGCGGGAGTTTATTACTGC
II-KV24	AAAATCATGATGACACAGACCCCACTGTCCCTGCCCATCACCCCTGGAGAGCCAGCCTCCATCTCCTGCCAGGCCAGTCAGAGCCTCGTACACAATAATGAAAACACCTATTTGCATTGGTACCTGCAGAAGCCAGGCCAGTCCCCACAGGGCCTGATCTACAGGGTTTCCAACCATTTCACTTGGGTCCCAGACAGGTTCAGTGGCAGCGGGTCAGGGACAGATTTCACCCTGAGAATCAGCACGGTGGAGGGTGACGGTGTTGGGGTTTATTACTGC
II-KV25	GAAATTGTGATGACACAGACCCCACTGTCCCTGCCCATCAGCCCTGGAGAGCCGGCCTCCATCTCCTGCAAGGCCAGTCAGAGCCTCCTGTACAGTAATGGAAAAACCTATTTGCATTGGTACCTGCAGAAGCCAGGCCAGTCCCCACAGCTCCTGATCTATGAGGTTTCCAACCATTTCTCTGGGGTCTCAGACAGGTTCAGTGGCAGCGGGTCAGGGACAGATTTCAACCTGAGAATCAGCAGGGTGGAGGCTGACGATATGGGAGTTTATTACTGT
II-KV26	GAAATCGTGATGACACAGACCCCACTGTCCCTGCCCATCACCCCTGGAGAGTCAGCTTCCATCTCCTGCAGGGCCAGTCAGAGCCTCCTGCATAGTAATGGAAACACCTATTTGTATTGGTTCCGGCAGAAGCCTGGCCAGTCCCCACAGGATCTGATCTATAAGGTTTCGAACCAGTATTCCTGGGTCCCAGACAGGTTCAGTGGCAGCGGGTCAGGGACAGATTTTACCCTGAGAATCAGCAGGGTGGAGGCTGACGATGTGGGAGTTTATTACTGT
II-KV27	GAAATCGTGATGGCACAGACCCCACTCTCACTGCCCATCACACCTGGAGAGCCGTCCTCCATCTCCTGCAGGGCCAGTCGGAGCCTCCTGCACAGTGATGGAAATACCTGTTTGTATTGGTACCTGCAGAAGCCAGGCCAGTCTCCACAAGGCCTCATCTACTTGGTTTCCAACCGTTACTCCTGGGTCCCAGACAGGTTCAGTGGCAGCGGGTCAGGGACAGATTTCACCCTGACCATCAGCATGGCGGAGGCTGATGATGTGGGGGTCTATTACTGC
II-KV28	GAAATTGTGATGACACAGACCCCACTGTCCCTGCCCATCAGCCCTGGAGAGCCGGCCTCCATCTCCTGCAAGGCCAATCAGAACCTCCTGCACAGTGATGGAAAAACCTATTTGACTTGGTTCCGGCAGAAGCCAGGCCAGTCTCCACAGGGCCTGATCTACTTGCTTTCCAAACGTTTCTCTGGGGTCTCAGACAGGTTCAGTGGCAGTGGGTCAGGGACAGATTTCACTTTGACCATCAGCCGGGTGGAAGCTGATGATGTGGGAATTTATTACTGC
II-KV29	GAGGTCGTGCTGACACAGACCCCGCTCTTGCTGTCCGTCACCCCTGGAGAACCGGCCTCCATCTCCTGCAAGGCCAGTCAGAGCCTTGTACACAGTAATGGAAATACCTATTTGGATTGGTACCTGCAGAAACCAGGCCAGTCCCCACAGCTCCTCATCTATGAGGTTTCCAACCGTTACACTGGGGTCCCAGACAGGTTCAGTGGCAGCGGGTCAGGGACAGATTTCACCCTGAGAATCAGCAGGGTGGAGGCTGATGATGTGGGAGTTTATTACTGC
II-KV30	GAGGTTGTGATTACACAGACCCCACACTTGCTGCCCGTCATCCCCGGAGAGTCAGCCTCCATCTCTTGCAGGGCCAGTCAGAGCCTCGTACACAGTACTGGAAACACCTATTTGTATTGGTACCTGCAGAGGCCAGGCCATTCCCCACAGGGCCTGATCTATAAGGTTTCCAACCGTTTCACTGGGGTCCCTGACAGGTTCAGTGGCAGTGGGTCAGGGACAGATTTCTCCCTGAGAATCAGCAGGGTGGAGGCTGACGATGTGGGAGTTTATTACTGC
II-KV31	GAGGTTGTGATGACACAGACCCCACTCTTCCTGCCCGTCACCCCCGGAGAACCAGCCTCCATTTCCTGCAGGGCCAGTCAGAGCCTACTACACAGTGATGGAAACACTTATTTGTATTGGTACCTGCAAAAGCCAGGCCAGTCTCCACAGCTTCTGATCTATGGGGTTTCCTACCGTTTCCTTCGGGTTCCGGGCAGGTTCAGTGGCAGTGGGTCAGGGACAGATTTCACCCTGAGAATCAGCAGGGTGGAGGCTGACGATATGGGAGTTTATTACTGC
II-KV32	GAGGTTGTGATGACACAGACCCCACTCTCACTGACTGTCACACCCAGAGAGCCGGCCTCCATCTCCTACAGGGCCAGTCAGAGCCTTGTACACAGTGATGGAAACACCTATTTGCATTGGTACCTGCAGAAGCCAGGCCAGTCCCCACAGCTCCTGATCTATAGTCATTTCACTGGGGTCCCAGACAGGTTCAGTGGTAGCGGGTCAGGGACAGATTTTACCCTGACAATCAACAGGGTGGAGGCTGATGATGTGGGAGTGTATTACTGT
II-KV33	GAGGTTGTGATGACACAGACCCCACTCTCACTGACTGTCACACCCGGAGAGCCAGCCTCCATCTCCTGCAGGGCCAGTCAGAGCCTTGTACACAGTGATGGAAACACCTATTTGCATTGGTACCTGCAGAAGCCAGGCCAGTCCCCACAGCTCCTGATCTACAGCCATTTCACTGGGGTCCCAGACAGGTTCAGTGGCAGTGGGTCAGGGACAGATTTCACCCTGACAATCAACAGGGTGGAGGCTGATGATGTGGGAGTTTATTACTGT
II-KV34	GAAGCTGTGCTGACACAATCCCCACTCACCCTGTCTGTCTCCCCAGGAGAGTCGGCCTCCATCTCCTGCAGGGCCAGTCAGAGCCTTGTACACAGTAATGGAAACACCTATCTGCATTGGTACCTGCAGAAGCCAGGCCAGTCCCCACAGGGCCTGATCTACAGGGTTTCCAACCATTACACTGGGGTCCCAGACAGGTTCAGTGGCAGTGGATCAGAGACAGATTTCACCCTGAGAATCAGCAGAGTGGAGGCTAATGATGTGGGAGTTTATTACTGC
II-KV35	GAGGCCGTGCTGACACAGACCACCCCACTCACCCTGTCTGTCACCTCCGGAGAGCCGGCCTCCAACTCCTGCAGGGCCAGTCAGAGCCTTGTACACAGTAATGGAAACACCTCTTTAAATTGGTACCTGCAGAAGCCAGGCCAGTCACCACAGATCCTGATCTACTTGGTTTCCAGCCGTGTCTCTGGAATCCCAGACAGGTTCAGTGGCAGTGGGTCAGGGACAGATTTCACCCTGACAATCAGCAGGGTGGAGGCTGGCGATGTGGGAGTTTATTACTGT
II-KV36	GATATAGTGCTGACACAGACCCCACTGTCTCTGTCCATCACCCCCGGAGAGTCAGCCTCCATCTCCTGCAGGGCCAGTCAGAGCCTTGTACACAGTAATGGAAACACCCATTTGAGTTGGTACCTGCAGAAACCAGGCCAGTCCCCACAGCTCCTGATCTACAAGATTTCCAACCATTTCACTGGGGTCCCAGACAGGTTCAGTGGCAGCGGGTCAGGGACAGATTTCACCCTGACAGTCAGCAGGGTGGAGGCTGATGATGTGGGAGTTTATTACTGC
II-KV37	GAGGTCGTGCTGACACAGACCCCACTCTCACTGTCCATCACCCCCGGAGAGTCAGCCTCCATCTCCTGCAGGGCCAGTCAGAGCCTTGTACACAGTAATGGAAACACCTATTTGAGTTGGTACCTGCAGAAGCCAGGCCAGTCGCCACAGCTCCTCATCTATAAGGTTTCCAACCGTTTCACTGGAGTCCCAGACAGGTTCACTGGCAGCGGGTCAGGGACAGATTTCACCCTGAGAATCAGCAGGGTGGAGGTTGATGACGTGGGAATTTATTACTGT
II-KV38/39	AAGGTTGTACTAACTCAGACCCCACTCTCACTGTCCGTCACCCCCGGAGAGTCGGGCTCCATCTCCTGCAGGGCCAGTCAGAGCCTCGTACACAGTGATGGAAACACATATTTGAGTTGGTACCTGCAAAAGCCAGACCAGTCACCACAGCTCCTCATCTATATGGTTTCCAACCGTTTCACTGGGCTCCCAGAAAGGTTCAGTGGCAGCGGGTCAGGGACAGATTTCACCCTGACAATCAGCAGGGTAGAAGCTGATGATGTGGGGGTTTATTACTGT
II-KV40	GAGGTCGTGCTGACACAGACCCCACTCTCACTGTCAGTCACGCCCGGAGAGCCAGTCTCCATCTCCTGCAGGGCCAGTCAGAGCCTCGTACACAGTAATGGAAACACCTATTTGCACTGGTACCTGCAGAAGCCAGGCCAGTCCCCACAGCTCCTGATCTACAAGGTTTCCAACCGTTTCACTGGGGTCCCAGACAGGTTCAGTGGCAGCGGGTCAGGGACCGATTTCACCCTGAGAATCAGCAGGGTGGAGGCTGACGATGTGGGAGTTTATTACTGT
II-KV41	GAGGTCGTGCTGACACAGACCCCACTCTCACTGTCAGTCACCCCCGGAGAGTCAGCCTCCATCTCCTGCAGGGCCAGTCAGAGCCTCGTACACAGTGATGGAAACACGTATTTAAATTGGTACCTGCAGAAGCCAGGCCAGTCCCCACAGCTCCTGATCTACAGGGTGTCCAACCGTTTCACTGGGGTCCCAGACAGGTTCAGTGGCAGCGGGTCAGGGACAGATTTCACCCTGAGAATCAGCAGGGTGGAGGCTGATGATGTGGGAGTTTATTACTGT
II-KV42	GAGGTCGTGCTGACACAGACTCCACTCTCGCTGTCCGTCACCCCCGGAGAGCCAGCCTCCATCTCCTGCAGGGCCAGTCAGAGCCTCGTACACAGTAATGGAAACACATATTTGAGCTGGTTCCGGCAGAAGCCAGGCCAGTCCCCACAGGGCCTGATCTACAAGGTTTCCAACCGTTTCACTGGGGTCCCAGACAGGTTCAGTGGCAGTGGGTCAGGGACAGATTTCACCCTGAGAATCAGCAGAGTGGAGGCTGATGATGTGGGAGTTTATTACTGC
II-KV43	GAGGTCGTGCTGACTCAGACCCCACTCTTGCTGTCCGTCACTCCTGGAGAGCCAGCCTCCATCTCCTGCAGGGCCAGTCAGAGCCTCGTACACAGTAATGGAAACACCTATTTGCATTGGTACCTGCAGAAGCCAGGCCAGTCCCCACAGCTCCTGATCTACAAGGTTTCCAACCGTTACACTGGGGTCCCAGACAGGTTCAGTGGCAGTGGGTCAGGGACAGATTTCACCCTGAGAATCAGCAGGGTGGAGGCTGATGATGTGGGAGTTTATTACTGT
II-KV44	GAGGTCGTGCTGACTCAAACCCCACTCTTGCTGCCCGTCACCCCCGGAGAGCCAGCCTCCATCTCCTGCAGGGCCAGTCAGAGCCTCATACACAGTGATGGAAACACCTATTTGCATTGGTACCTACAGAAGCCAGGCCAGTCCCCACAGGGCCTGATCTACAAGGTTTCCAACCGTTTCACTGGGGTCCCAGACAGGTTCAGTGGCAGCGGATCAGGGACAGATTTCACCCTGAGAATCAGCAGGGTGGAGGCTGATGATGTAGGAGTTTATTACTGT
II-KV45a	GAGGTCGTGCTGACACAGACCCCACTCTCACTGTCAGTCACCCCCGGGGAGCCAGTCTCCATCTCCTGCAGGGCCAGTCAGAGCCTCGTACACAGTAATGGAAACACGTACGTGAGTTGGTTCCGGCAAAAGCCAGGCCAGTCCCCACAGCTCCTGATCTACAAGGTTTCCAACCGTTTCACTGGGGTCCCAGACAGGTTCAGTGGCAGCGGATCAGGAACAGATTTCACCCTGAGAATCAGCAGGGTGGGGGCTGATGATGTGGGAGTTTATTACTGT
II-KV45b	GAGGTCGTGCTGACACAGACCCCACTCTCACTGTCAGTCACCCCCGGGGAGCCAGTCTCCATCTCCTGCAGGGCCAGTCAGAGCCTCGTACACAGTAATGGAAACACGTACGTGAGTTGGTTCCGGCAAAAGCCAGGCCAGTCCCCACAGCTCCTGATCTACAAGGTTTCCAACCGTTTCACTGGGGTCCCAGACAGGTTCAGTGGCAGCGGATCAGGAACAGATTTCACCCTGAGAATCAGCAGGGTGGAGGCTGATGATGTGGGAGTTTATTACTGT
II-KV45c	GAGGTCGTGCTGACACAGACCCCACTCTCACTGTCAGTCACCCCCGGGGAGCCAGTCTCCATCTCCTGCAGGGCCAGTCAGAGCCTCGTACACAGTAATGGAAACACGTACTTGAGTTGGTTCCGGCAAAAGCCAGGCCAGTCCCCACAGCTCCTGATCTACAAGGTTTCCAACCGTTTCACTGGGGTCCCAGACAGGTTCAGTGGCAGCGGATCAGGAACAGATTTCACCCTGAGAATCAGCAGGGTGGAGGCTGATGATGTGGGAGTTTATTACTGT
II-KV46	GAGGTCGTGCTGACACAGACTCCACTCTCACTGTCAGTCACCCCTGGAGAGCCGGTCTCCATCTCCTGCAGGGCCAGTCAGAGCCTCGTACACAGTAATGGAAACACCTATTTGCACTGGTACCTGCAGAAGCCAGGCCAGTCCCCACAGGGCCTGATCTACAAGGTTTCCAACCGTTTCACTGGGGTCCCAGACAGGTTCAGTGGCAGCGGGTCAGGGACCGATTTCACCCTGAGAATCAGCAGGGTGGAGGCTGACGATATGGGAGTTTATTTCTGC
II-KV47	GAAATCGTGATGACACAGACCCCGCTGTCACTGTCCGTCACCCCCGGAGAGCCGGCCTCCATCTCCTGCAGGGCTAGTCAGAGCCTCCTACATAGTAATGGAAACACCTATTTAAATTGGTACCGGCAGAAGCCAGGCCAGTCCCCACAGCTCCTCATCTACTTGGTTTCCAACCGTTTCACTGGAGTCCCAGACAGGTTCAGTGGCAGCGGGTCAGGGACGGATTTCACGTTGAGGATCAGCAGGGTGGAGGCTGACGATATGGGAGTTTATTACTGC
II-KV48	GAGGTCGTGCTGACACAGACTCCACTCTCACTGTCAGTCACCCCCGGAGAGCCGGCCTCCATCTCCTGCAGGGCCAGTCAGAGCCTCGTACACAGTAATGGAAACACGTACTTGAGTTGGTACCTGCAGAAGCCAGGCCAGTCCCCACAGGGCCTAATCTACAAGGTTTCCAACCGTTTCACTGGGGTCCCAGACAGGTTCAGTGGCAGCGGATCAGGGACAGATTTCACCCTGAGAATCAGCAGGGTGGAGGCTGACGATGTGGGAGTTTATTACTGT
I-KV1	GAGATTGTCCTGACCCAGTCTCCTGCCGTCCTGTCCATGGCTCCAAAAGAAAGAGTCACCATCACCTGCCAGGCCAGTCAGAACATTAACAAGTGGTTAGCCTGGTATCATCAGGAGCCAGGGAGAGCTCCTAAGCTCCTCATCTATGAGGCATCCAAGTTGATAACTGGGGTCCCATCACGGTTCAGCGGCAGTGGGTCTGGGACAGACTTCACTCTCACCATCAGCAGCCTGGAGCCTGAAGATGCTGGGACCTACTATTGC
I-KV2	GAAAATGTGCTGACCCAGTCTTCTGCCATCCTATCCATGGTTCCAAAAGAAAGAGTCAGCATCACCTGCAGGGCCAGTCAGAACATTAACAAGTGGTTAGCCTGGTATCAGCAGGAGCCAGGGAGAGCTCCTAAACTCTTGATCTGTGAAACATCCAAGTTGGAAACTGGGGTCACGTCGCGGTTCAGTGGCAGTGAGTCTGGAACAGACATCACTCTCATCAGCAGCAGCCTGGAGCCTGAAGATGCTGGGACCTACTACTGC

## Sheet: Lambda Variable
Lambda Variable
II-LV1_(GL897406.1)	TCCAGTGAGCTGACACAGCTGCCCTCAGTGTCAGTGGCCCTGGGTCAGACGGCTACAATCACCTGCACTGGAGAGGAACTGGACTATACTGTGCAGTGGTACCAGAAGAAGCCAGGCCAAGCCCCTTTGACAATCATTTATGATGAGAGCGAGAGGCCCTCAGGGATCCCAGAGCGATTCTCTGGCTCCAGATCGGGGAACACAGCCACCCTGACCATCAGTGGGGTCCAGGCTGAGGATGAGGCTGACTATTACTGT
II-LV2_(AEYP01111698.1)	TCCAGTGAACTGACTCAGCCTCCCTCAGTGTCAGTTGCCCTGGGTCAGACGGCTACAGTCACCTGCACTGGAGGGGAGTTAGAGTATTTTTATGTACACTGGTACCAGCAGAAGCCAGGCCAAGCCCCTTTGACAATCATTTATGGTGATAAGGAGAGGCCCTCAGGGATCCCAGAGCGATTCTCTGGCTCCAAGTCGGGGAGCACGGCTACCCTGACCATCAGCAGCGCACAGGCTGAGGACGAGGCTGACTATTACTGT
II-LV3_(GL896906.1)	ACCAGTGAACTGACTCAGCCTCCCTCAGTGTCAGCTGCCCTGGGTCAGACCGCTACAATCACCTGCACTGGAGAGGAAGTAGAATATATTTATGTCTACTGGTACCATCAGAAGCCAGGCCAAGCCCCTCTGACGGTCACTTACGATGATAGTGATCAGCCTTCAGGGATCCCAGAGAAATTCTCTGGCTCCAAGTCAGGGAACACGGCCACCCTGACCATCAGCAGCGCACAGGCCAAGGACGAGGCTGACTATTACTGT
II-LV4_(AEYP01112098.1)	TCCAGTGAGCTGACTCAGACGCCCTTTGTGTCAGTGGCCCCGGGACAGACCGCTACAATCACCTGCTCTGGAGAAGAACTGGACTATGGTTATGTACAATGGTACCAACAGAAGCCAGGGCAAGCCCCTCTGATGGTAATTTATTTGGATAATGAGCGGGCCTCTGGGATCCCAGAGCGATTCTCTGGCTCCAAGTCAGGGAACACGGCCACCCTCACTATCAGCAGCGTACAGGCCGAGGACGAGGCTGACTATTTCTGT
II-LV5_(GL896906.1)	TCCAGTGAGGTGACTCAGCCACCCTTTGTGTCAGTGGCCCTGGGACAGACCGCTACAATCACCTGCACCGGAGAGAAGGTGAAATATAGCTCTATACACTGGTACCAGCAGAAGCCAGGGCAAGCCCCTCTGACCGTCATTTATGCAGAGATTGAGCGGCCCTCTGGGATCCCAGAGCGATTCTCTGGCTCCAGGTCAGGGAACACGGCCACCCTCACCATCAGCAGTGTACAGGCCGAGGACGAGGCTGACTATTACTGT
II-LV6_(GL897285.1)	TCCAGTGTGCTGACTCAGTCTCCCTCAGTATCAGTGTCCCTGGGACAGACAGCTACCATCACCTGCTCTGGAGAGATACTGAGCAAAAGTTATGCACGATGGCACCAGCAGAAGCCAGGCCAATCCCCTGTGAACATTATTTATAAGGACACCCAGCGTCCCTCTGGGATCCCTGACCGATTCTCTGGGTCCAGCTCAGGGAGCACACACACCCTGACCATCAGCAGGGCTCAGGCTGAGGACGAGGCTGACTACTACTGT
II-LV7_(GL897285.1)	TCCAGTGTGCTGACTCAGTCTCCCTCGGTGTCTGTGTCCCTGGGACAAACGGCTACAATCACCTGCTCTGGAGAAGTACTGAACAAAAAATACGCACAGTGGTTCCAGCAGAAGCCAGGCCAAGCACCCATGCTGGTCATTTATAAGGACACTGAGCGTCCTTCTGGGATCCCTGACCGATTCTCTGGCTCCAGTTCAGGGACCACACACACCCTGACCATTAGTGGGACCCGGGCTGAGGACGAGGCTGACTATTACTGT
II-LV8_(GL897406.1)	TCCAGTGTGTTGACTCAGCCTCATTCAGTGTCAGTGTCCCTGGGACAGATGGCTACCATCAGCTGCTCTGGAGAGATATTGTCAGGAAGTTATGCATATTGGTACCAGAAGAAGCCAGGCCAACCCCCTGTGCAGGTCATTTATAAGGACACTGAGCGTCCTTCTGGGATCCCGGACCGATTCTCTGGCTCCAGTTCTGGCACCACACACACCCTGACCATCAACGGGGCCCAGGCCGAGGATGAGGCTGACTATTACTGC
II-LV9_(GL897344.1)	TTCAGTGTGTTGACTCAGCCTCATTCGGTGTCAGTGTCCCTGGGACAGACAGCTACCATCATCTGCTCTGGGGAAGTACTGAGCAAATACTATGCACAATGGTACCAGCAGAAGGCAGGTCAAGCCCCCAAGCAGGTCATTTATAAGGACACTGAGTGTCCCTCTGGGATCCCTGACCAATTCTCTGGTTCCAGTTCAGGGACCACACACACCCTGACCATCAACGGAGCCCAGGCCGAGGATGAGGCTGACTATTACTGT
II-LV10_(GL897406.1)	TCCAGTGTGTTGACTCAGCCTCATTTGGTGTCAGTGTCCCTGGGAGAGACAGCTACCATCACCTGCTCTGGGGAAGTACTGAGCAAGTACTATGCACAATGGTACCAGCAGAAGGCAGGTCAAGCCCCCAAGCAGGTCATTTATAAGGACACTGAGCGTCCTTCTGGGATCCCTGACCGATTCTCTGGTTCCAGTTCAGGGACCACACACACCCTGACCATCAACAGGGTCCAGGCTGAGGATGAGGCTGACTATTACTGT
II-LV11_(GL897565.1)	GCCTATGAGCTGACTCAGCCTCCCTTAATGTCGGTGAACCTGGGACGGACGGCCAGCATCACCTGCAGTAGAGACAACATTGGAAATACATATGTTTCCTGGTACCAACAGAAGCTGGGCAAGGCACCCATGATGATTATCTATAGTGGTAGCAACCGGCCCTCAGGGATCCCAGACCGGTTCTCTGGCTCCAATTCAGGGAACACGGCCACCCTGACCATCAGCGGGGCTCAGGCAGAGGACGAGGCTGACTATTACTGTTT
II-LV12_(GL897406.1)	GCCTACGTGCTGACTCAGCCTCCCTCAATGTCGGTGAACCTGGGACGGACGGCCAGCATCACCTGCAGTGGAGACAACATTGGAAGTACATATGTTTCCTGGAACCAACAGAAGCCGGGCCAGGCACCAGTGACAATTATCTATAGTGATAGCAGCCGGCCCTCAGGAATCCCTGACAGGTTCTCTGGCTCCAACTCGGGGAACATGGCCACCCTGACCATCAGCGGGGCCCGGGCTGAGGATGAGGCTGACTATTACTGT
II-LV13_(GL897418.1)	GCCTACGTGCTGACTCAGCCTCCCTCAATGTCGGTGAACCTGGGACAGATGGCCAGCATCACCTGCAGTGGAGACAACATTGGAGGAATATATGTTTCCTGGCAACAACTGAAGTTGGGACAGACACCCATGACAATTATATATAGTGATAGCAACCAGCCCTCAGGAATCCCTGACAGGTTCTCTGGCTCCAACTCAGGGAACATGGCCACCCTGACCATCAGCGGGGCCCAGGCTGAAGATGAGGCTATTACTGACTATTACTGT
II-LV14_(GL897418.1)	TCCTATGTGCTGACACAGCCCCCATCTGTGTCGGTGGCCCTGGGGCAGACGGCCCAGGTCACATGTACGGGAAACAACATTGGAAGTAAACATGTTTACTGGTACCAGCAGCAGCCAGGCCATATCCCTGTGCTGATCATCTATAATAGCAACAAACGGCCCTCAGGGACTCCTGAGCGATTTTCAGGCACCGGCTCTGGGAACACGGCCACCCTGACCATCAGTGGGGCCCAGGCTGAGGACGAGGCTGACTATTACTGT
II-LV15_(GL897285.1)	TCCTATGTGCTGACTCAGCCCCCATCTGTGTCAGTGGCTCTGGGAAAGACAGCCCAGGTCACCTGTGGGGGAAACAACATTGGAAATAAATATGTTCACTGGTACCAGCAGAAGGCAGGCCAGGCTCCTGTGCTGATCATCTATGAAAGCAACAAACGGCCCTCAGGGATTCCTGAGCGATTTTCAGGCACCAACTCTGGGAACACGGCCACCCTGACTATCAGTGGGGCCCGGGCTGAGGACGAGGCTGACTATTACTGT
II-LV16_(GL897418.1)	TCCTATGTGCTGACTCAGCCTCCATCTGTGTCAGTGGCTCTGGGACAGACAGCCCAGGTTACCTGCGGGGGAAACAACATTGGAAATAAATTTGTTCACTGGTACCAGCAGAAGCCGGGCCAGGCTCCTGTGCTGATCATCTATAACAGCAACAAACGGCCCTCAGGGATTCCTGAGCGATTTTCAGGCACCAAATCTGGGAACACGGCCACCCTGACCATCAGTGGGTCCCGGGCTGAGGATGAGGCTGACTATTACTGT
II-LV17_(GL896906.1)	GCTTATGAGCTGACTCAGGACTCCTCGGTGTCAGTGAACCTGGGACAGACGGCCAGGATCACGTGTCGGGGAGACAACATTGGTAGTAAATATGCTTACTGGTACCAGCAGAAGCCAAGCCAGGCCCCTCTGCTAATTATCTATGGTGATAGCAACCGGCCCTCAGGGATCCCTGAGCGATTCTCAGGAACGAACTCGGGGAACACGGCCACCCTGACCATCAGCGGTGCCCAGGCTGAGGATGAGGCTGACTATTACTGT
II-LV18_(AEYP01110728.1)	TCCTATGTGCTGACTCAGCCTCCCTCGATGTCAGTGAACCTGGGACAGACGGTCAGGATGACTTGTGGGGGAAACAACATTGGAAGAAAAAGTGTTCCGTGGTACCAGCAGAAGCCAGGTCTGGCCCCTGTGATGATTATCTACGGTGATAGCAGCCGGCCCTCAGGGATCCCTGACCGGTTCTCAGGCACCAACTCGGGGAACACAGCCACCCTGACCATCAGCGGGGTCCGGGCTGAGGACGAGGCTGACTATTACTGT
II-LV19_(GL897406.1)	TCATATGTGCTGACTCAACCACCCTCAATATCGGTGAACCTGGGACAGACGGCCAAGATCACATGTGAGGGAAACAACATTGGAAGAAAAAGTATTTACTGGTACCAGCAGAAGCTGGACCAGTCCCCCGTATTGATTATCTATAGGAATAGCAACCGGCCCTCAGGGATCCCTGACCGGTTCTCAGGCACCAACTCGGGAAACATGGCCACCCTGACCATCAGCGGAGCCTGTGCTGAGGACGAGGCTGACTATTACTGT
II-LV20_(GL896906.1)	TCGTATGTGCTGACTCAACCACCCTCAATATCGGTGAAACTGGGACAGACGGCCAAGATCACGTGTGGGGGAGACAACATTGGGAATAAATATGCTTACTGGTACCAGCAGAAGCCAGGCAGGGTCCCTGTGCTGATTATCTACGAGGATAGCAAAAGGCCGTCAGGGATTCCTGACCAGTTCTCAGGCACCAACTCAGGGAATACAGCCACCCTGACCATCAGCGGGGCCCGTGCTGAGGACGAGGCTGACTATTACTGT
II-LV21_(AEYP01108526.1)	TCATATGTGCTGACTCAACCACCCTCACTATCGGTGAACCTGGGACAGACGGCCAAGATCACGTGTGGGGGAGACAACATTGGGTGTGAAAATGCTCACTGGTACCAGCAGAAGCCAGGTCAGGCACCTGTGCTGATTATCTATACTGATAAAAACCAGCCTTCAGGGATCCCTGACCGGTTCTCAGGCTCCAACTCGGGGAATACAGCCACCCTGACCATCAGCAGGGCCCATGCTAAGGATGAATCTGACTATTACTGT
II-LV22a	TCATATGTGCTGACTCAACCACCCTCACTATCGGTGAACCTGGAACAGACGGCCAAGATCACATGTGGGGGAAACAACATTGGGGGTAAAAGTGTTCACTGGTACCAGCAGAAGCCAGCACAGGTCCCTGTGCTGATTATCTATAATGGTAAAAACCGGCCCTCAGGGATCCCTGACCGGTTCTCAGGCACCAACTCGGGGAACACAGCCACCCTGACCATCAGCGGCACCCGCGCTGAGGACGAGGCTGACTATTACTGT
II-LV22b	TCATATGTGCTGACTCAACCACCCTCACTATCGGTGAACCTGGAACAGACGGCCAAGATCACATGTGGGGGAAACAACATTGGGGGTAAAAGTGTTCACTGGTACCAGCAGAAGCCAGCACAGGTCCCTGTGCTGATTATCTATAATGATAAAAACCGGCCCTCAGGGATCCCTGACCGGTTCTCAGGCACCAACTCGGGGAACACAGCCACCCTGACCATCAGCGGCACCCGCGCTGAGGACGAGGCTGACTATTACTGT
II-LV23	TCCAGTGAACTGACTCAGCCTCCCTCAGTGTCAGTTGCCCTGGGTCAGACGGCTACAGTCACCTGCACTGGAGGGGAATTAGAGTATTTTTATGTACACTGGTACCAGCAGAAGCCAGGCCAAGCCCCTTTGACAATCATTTATGGTGATAAGGAGAGGCCCTCAGGGATCCCAGAGCGATTCTCTGGCTCCAAGTCGGGGAGCACGGCCACCCTGACCATCAGCAGCGCACAGGCTGAGGACGAGGCTGACTATTACTGT
I-LV1_(GL897285.1)	TGGGCTGTGCTGACTCAGCCTCCCTATGTGTCTGGGGCCCTAGGTGAGAGTGTCACCATCTCCTGCACTGGAATCCCCACCAGCATAGATTATGATGAAGAGGAATACACATATAATGTGAACTGGTACCAACAGCTCCAAGGAAAGGTACCCATTCTACTCATCTATGGAGATAATAACAGAAATCCTGGAGTCCCTGATCGATTCTCTGGTTCCAAGTCAGGCAGCTCAGCCTCCCTGACCATCAGTGGCCTTCAGGCTGAAGATGAGGCTGATTATTACTGC
I-LV2_(GL897638.1)	CAGTCTATGCTGACTCAGCCACCCTCTGTGTCTGGGGCCCTGGGACAGAGGGTCACCATCTCCTGCACTGGAAGCAGCTCCAATATTGGGAGTGGTAATTATGTGTACTGGTACCAACAACTTCCAGGAATAACCCCCAAACTCATCATCTATGGTAGTAGCAACCGACCCTCTGGTGTCCCAGATCGATTCTCTGGCTCCAGGTCTGGCAGCTCAGGCACCCTGACCATCACTGGGCTCCACACTGAGGATGAGGCTGATTATTACTGC
IV-L1_(GL897406.1)	GCACCTGTGCTGACTCAGCCTCCATCTGCATCTGCCTCTCCAGGAGCCTCTGTCAAGCTCACCTGCACCCTGAGCAGGGAGCACAGCAATTACTATATTCACTGGTATCAACAGGAACCAGGGAAGGCCCCTCGGTATGTGATGATGGTTAATAGTGACGGAAGCCACAACAAGGGGGACGGAATCCCCAGTCGCTTCTCAGGATCCAGCTCTGGGGTTGACCGCTACTTAACCATCTCCGACATCCAGTCTGAGGATGAGGCTGAGTATTACTGT
IV-L2_(GL897418.1)	CTGCCTGTGCTGACCCAGCTTTCATCTGCATCTGCCTCCCTGGGAGCCTCAGTCAAGCTCACCTGCACCCTGAGCAGTGAGCACAGCAATTATTTGGTTCACTGGTATCAACAGCGACCAGGGAAGGCTCCCCTGTATATGATGACAGTTAATAGAGATGGAAGCCACAGCAATGGGGATGGGATCCCCAACCGCTTCTCAGGCTCCAGCTCTGGAGTTGACCGCTATTTAGCCATCTCCAACATCCAGTCTGAAGATGAGGCTGAGTATTACTGT
V-LV1_(GL897285.1)	CAGCTTTTGGTGACCCAGCCTCCCTTCCTCTCTGCATCTCTGGAAACAACAGCCAGACTCACCTGCACCCTGAGCAGTGACATCAGTGTTGATATTTACCCGATATTCTGGTACCAGCAGAAGCCAGGGAGCCCTCCTCGTTACCTCCTTACCTATGTAACAGACTCAAACAAGCACCAGGGCTCTGGGGTCCCGAGCCGCTTCTCTGGATCCAAAGATGCCTCAGCCAGTGCAGGGATCCTGCTCATCTCTGGGCTCCAGGCAGAGGATGAGGCTGATTATTACTGT
V-LV2_(GL897484.1)	CAGCCAGTGCTGACTCAGCCACCATCCCTCTCTGCCTCTCTCGGAACAACAGCCAGACTCACCTGCACCCTGAGCAGTGGCTTCAGTGTCAGGAGTTATAACATATACTGGTACCAGCAGAAGCCAGGGAGCCCTCCCAGGTATCTCCTGTGGTTCTACTCAGACTCAGATAAGCACCAGGGCTCGGGGGTCCCCAGCCGCTTCTCTGGCTCCAAAGATGCCAATGCAGGGCTTCTACTCATCTCTGGGCTCCAGCCTGAGGACGAGGCTGACTATTACTGT
V-LV3_(GL897019.1)	CAGCCTGTGCTGACCCAGCCGCCCTCACTCTCTGCATCTCCGGGAACAACAGCCAGACTCACCTGCACCTTGAGCAGGGATATCAGTGTTGGTAGTAAATACATGCACTGGTACCAGCAGAAGCCAGGGACCCCTCCCAGGTATCTCCTGTACTACTACTCAGACTCAAGTACACAGCTGGGACCTGGGATTCCCAGTCGCTTCTCTGGCTCCAAGGATACCTCAGCCAATGCAGGGATTCTGCTCATCTCTGGGCTGCAGCCTGAGGACGAGGCTGACTATTACTGT
V-LV4_(GL897400.1)	CAGCCTGTGCTGACCCAGCCGCCCTCACTCTCTGCCTCTCTGGGAACAATAGCCAGACTCACCTGCACCTTGAGCAGGGACATCAGTGTTGGTAGTAAATACATGTACTGGTACCAGCAGAAGCCAGGGACCCCTCCCCGGGTTCTCCTGTACTACTACTCAGACTCAAATACACAGCTGGGACCTGGGATTCCCAGTCGCTTCTCTGGCTCCAAGGACACTTCAGCCAATGCAGGGATTCTGCTCATCTCTGGGCTGCAGCCTGAGGACGAGGCTGACTATTACTGT
V-LV5_(GL897285.1)	CAGCCTGTGCTGACCCAGCCAACGTCCCTCTCTGCATCTGTAGGAGCAACAGCCAGACTCACCTGTACCTTGAGCAGGGACATAAGTGTCAGTGGGAAAAACATGTACTGGTATCAGCAGAAGCCTGGAAGCCCTCCCCGGTTTTTCCTGTACTACTACTCAGACTCAGACAAGCAGCTGGGACCTGGGGTCCCCAGTCGAGTCTCTGGATCCAAAGATACCCCCACAAACACAGCAATTTTGTTCATCTCTGGGCTCCAGCCTGAGGACGAGGCTGATTATTACTGT
V-LV6_(GL897400.1)	CAGCCTGTGCTGACCCAACCTCCCTCCCTCTCTGCTTCCCTGGGATCATCAGCCAGACGCACCTGCACCCTGAGCAGGGACATCAATGTTGGTGGTAAAAACATGTTCTGGTACCAGCAGAAGCCCGGAAGCCCTCCCCGTTATTTCCTGTACTACTACTCAGACTCAGATAAGCAGCTGGGACCTGGGGTCCCCAGTCGTGTCTCCGGATCCAAAGATACCTCCACCAATACGGCAATTATGCTCATCTCTGGGCTTCAGCCTGAGGATGAGGCTGACTATTACTGT

## Sheet: Diversity (Heavy only)
Heavy Diversity
IGHD1	TTACTACGGTAGCTACAGC
IGHD2	ATAACTACGATAACTAC
IGHD3	GGTACTGGAATAGTATCTCC
IGHD4	GCTACAGTAGCAGCTGGATC
IGHD5	GAATGAAACTGGACCATTCACTTA
IGHD6	GAATGTATCAACCATGATCCAGG
IGHD7	CTAACTGGGGC

## Sheet: Joining
Heavy Joining
IGHJ1	CTTCTGGGATTTGGTTTACTGGGGCCAAGGCTCCCTGGTCACCGTCTCCTCAG
IGHJ2	GCCATGACTACTTGGACGTCTGGGGCCAGGGCACCCTGGTGACCGTCTCCTCAG
IGHJ3	AGTACTTTGACTACTGGGGCCAGGGGACCCTGGTCACCGTCTCCTCAG
IGHJ4	TGACAACTGGCTTGACTACTGGGGCCAGGGGACCCTGGTCACCGTGTCCTCAG
IGHJ5	ACTACTATGCTATGGGCTACTGGGGCCAGGGGACCTCGGTCACCGTGTCCTCAG
Kappa Joining
IGKJ1	GTGGACGTTCGGCGCAGGGACCAAGGTGGAAATCAAAC
IGKJ2	TGTACACGTTCAGCCAGGGGACCAAGCTGGAGATAAAAC
IGKJ3	GTTCACTTTCGGCCAAGGGACCAGACTAGACATCAAAC
IGKJ4	GCTCACGTTCGGCCAGGGGACCAAGGTGGAGCTCAAAC
IGKJ5	GGACAGCTTTGGCCCAGGGACACGTCTGGAGATTAAAC
Lambda Joining
IGLJ1	TCCGGTGTTCGGCGGAGGGACCCAGCTGACCGTCCTAG
IGLJ2	TTATGTGTTCGGCGGAGGGACCCAGCTGACCGTCCTAG
IGLJ3	TTGGGTGTTCGGCGGAGGGACCCAGCTGACCGTCCTAG
IGLJ4	TATAGTGTTCGGCGGCGGGACCCAGCTGACCGTCCTCG

## Sheet: Constant
Ferret_IgA_(Genomic)	GAGCCCAAAGCCAGCCCCAGTGTCTTCCCGCTGAGCCTCTGCAGCTGTGACGAAGCCGGGCACGTGGTCATCGCCTGCCT
	GGTGCAGGGGTTCTTCCCACCAGAGCCCGTGAAGGTGACCTGGAGCCCCGGCAAGGAGGGCGCGTCCGTGAGGAGCTTTC
	CCCCTGTGAAGGCCACGGCCGGCAGTCTGTACACCATGAGCAGCCAGCTGACCCTGCCCGCCGACCAGTGCCCCGCCGGG
	TCGTCCCTGCAATGCCACGTTCAGCACCTCTCCGACCCCAGCAAGGCTGTGTCTGTGCCCTGCCAAGGTCGAGGCCTGTG
	TCCCCCCCATTGTCAGTGTCCCTCGTGCGACCAGCCCCGCCTGTCACTTCACCCGCCCGCCCTTGAGGATCTGCTTGTGA
	CCTCCAATGGCAGCCTCACGTGCACGCTGAGTGGCCTGAAAGACCCCAAGGGAGCCTCCTTCAGCTGGACGCCCTCCGGG
	GAGAAGGACGCCATCCAGAAGGCCCCCAAGCGGGACGCCTGCGGCTGCTATAGCGTGTCCAGCGTGCTGCCGGGCTGCGC
	GGCGCCGTGGAACAGTGGGGTCACCTTCTCCTGCACGGCCACCCACCCCGAGTCCAAGAGCCCGATTACCGGCAACATCA
	GCAAACTCCTAGGAAACACCTTCCGGCCCCAGGTCCACCTGCTGCCGCCGCCGTCGGAGGAGCTGGCCCTCAACGAGCTG
	GTGTCGCTGACCTGCTTGGTGAGGGGCTTCAGCCCCAAGGACGTGCTAGTCCGCTGGCAGCAGGGGACCCAGGAGCTGCC
	CCCGGAGAAGTACACGACCTGGAAGTCCCTGAAGGAGCCCGGCCGGGGCAGCCCCACCTTCGCCGTGACCAGCGTGCTGA
	GGGTCGACGCCGAGGCCTGGAAGCAGGGGGACAAGTTCTCCTGCGTGGTGGGCCACGAGGCCTTGGGCCCGGCCAACTTC
	ACCGAGAAGACCATCGACCGCCTGGCGGGTAAACCCACCCACGTCAACGTGTCTGTGGTCGTGGCAGAGGCGGACGGCGT
	CTGCTAC
Ferret_IgA_(Transcript)	GAGCCCAAAGCCAGCCCCAGTGTCTTCCCGCTGAGCCTCTGCAGCTGTGACGAAGCCGGGCACGTGGTCATCGCCTGCCT
	GGTGCAGGGGTTCTTCCCACCAGAGCCCGTGAAGGTGACCTGGAGCCCCGGCAAGGAGGGCGCGTCCGTGAGGAGCTTTC
	CCCCTGTGAAGGCCACGGCCGGCAGTCTGTACACCATGAGCAGCCAGCTGACCCTGCCCGCCGACCAGTGCCCCGCCGGG
	TCGTCCCTGCAATGCCACGTTCAGCACCTCTCCGACCCCAGCAAGGCTGTGTCTGTGCCCTGCCAAGGTCGAGGCCTGTG
	TCCCCCCCATTGTCAGTGTCCCTCGTGCGACCAGCCCCGCCTGTCACTTCACCCGCCCGCCCTTGAGGATCTGCTTGTGA
	CCTCCAATGGCAGCCTCACGTGCACGCTGAGTGGCCTGAAAGACCCCAAGGGAGCCTCCTTCAGCTGGACGCCCTCCGGG
	GAGAAGGACGCCATCCAGAAGGCCCCCAAGCGGGACGCCTGCGGCTGCTATAGCGTGTCCAGCGTGCTGCCGGGCTGCGC
	GGCGCCGTGGAACAGTGGGGTCACCTTCTCCTGCACGGCCACCCACCCCGAGTCCAAGAGCCCGATTACCGGCAACATCA
	GCAAACTCCTAGGAAACACCTTCCGGCCCCAGGTCCACCTGCTGCCGCCGCCGTCGGAGGAGCTGGCCCTCAACGAGCTG
	GTGTCGCTGACCTGCTTGGTGAGGGGCTTCAGCCCCAAGGACGTGCTAGTCCGCTGGCAGCAGGGGACCCAGGAGCTGCC
	CCCGGAGAAGTACACGACCTGGAAGTCCCTGAAGGAGCCCGGCCGGGGCAGCCCCACCTTCGCCGTGACCAGCGTGCTGA
	GGGTCGACGCCGAGGCCTGGAAGCAGGGGGACAAGTTCTCCTGCGTGGTGGGCCACGAGGCCTTGGGCCCGGCCAACTTC
	ACCGAGAAGACCATCGACCGCCTGGCGGGTAAACCCACCCACGTCAACGTGTCTGTGGTCGTGGCAGAGGCGGACGGCGT
	CTGCTAC
Ferret_IgD_(Genomic)	GAAACGCTGCATCTGTTCCCCTTGGTCTCAGAGTGTAAAGTCCCGAAGCAAGGCGACTCCCTAGGCCTGGCCTGCTTGGC
	ACAAGGACCCTCCGTGGAGTCCTTGCGGGTGGTCTCGAGCTCGAGCTCGGGGCCGCAGACGACCACCATGATCACGCTGG
	GGAGCCGAGAGCGCATGCAGCTGTCCTTCCTGTCGGTCTTCTGGAAGCCGGACCCGCACTTCTGCAGAGCCGTAGTTTCC
	GGCCGCCCGCAGCAGAAGCCCATCCCGTGGCCAGAGTCCTGGGAAAGGAAGACTGACCCACCGGCTCACGGGCCGTCTCC
	GCCGGAGACCTCCACACCCAGCGCCCCAGTGTCCTCCACCCGCCACACCCGGACACAAGCCGCGGAGTCAGGAAGCCCAG
	TGGACGCTACGCTCAGAGACTGCCGGAACCACACTCACCCTCCCAGCCTCTACCTGCTGCAGCCTCCCCTGCGGGGCCCG
	TGGCTCCAGGGAGAGGCCACCTTCACCTGCCTGGCGGTGGGGGATGACCTGCAGGAGGCCCGCATGTCCTGGGCGGTGGC
	CAGGGCGCCCCCCAGCGGGGCGGTGGAGGAGGAACTGCGGGAGGAGCACACCAACGGCTCCCAGAGCCTGAGCAGCCGGC
	TGGCCTTGCCCGTGTCCCTGTGGGCCTCGGGGACCAGCATCGCCTGCACGCTGAGCCTGCCCAACAGGCCGGCCCAGGTG
	GCGTCTGTGGCACCGGGACAGCACGCGGCCACCGCGCCCAGCAGCCTCACTGTCCGCGTCCTGACCGTGCGCCAAGCCGC
	CTCCTGGCTCCTCTGTGAGGTGTCAGGCTTCTCGCCCCCGGACATCCTCCTCACCTGGCTCAAGGGCCGCATGGAGGTGG
	ACCCTGGTGCCTTTGCCACCGCACGCCCCATGGCCCAGCCTGGGAACAGCACGTTCTGGACCTGGAGTGTCCTGCGTGTC
	CTCGCAGCCCAGAGCCCAGGCCCGGCCACCTACACGTGTGTGGTGAGGCATGATGCCTCCCGGAAGCTGTTCAACAGCAG
	CCAGAGCCTGGACGCTGGTCTGGCCATGACGCCCCCACCGCCCCAGAGCCACGAGGAGAGCAGGGGGTACGCCACGGACC
	TGGGGGACGCCACGGACCTGGAGGACACGGGCGGGCTATGGCCCACGTTTGCCGCCCTCTTCCTGCTCGCTCTGCTCTAC
	AGCGGCTTTGTCACCTTCATCAAGGTGAGG
Ferret_IgD_(Transcript)	GAAACGCTGCATCTGTTCCCCTTGGTCTCAGAGTGTAAAGTCCCGAAGCAAGGCGACTCCCTAGGCCTGGCCTGCTTGGC
	ACAAGGACCCTCCGTGGAGTCCTTGCGGGTGGCCTCGAGCTCGAGCTCGGGGCCGCAGACGACCACCATGATCACGCTGG
	GGAGCCGAGAGCGCATGCAGCTGTCCTTCCTGTCGGTCTTCTGGAAGCCGGACCCGCACTTCTGCAGAGCCGTAGTTTCC
	GGCCGCCCGCAGCAGAAGCCCATCCCGTGGCCAGAGTCCTGGGAAAGGAAGACTGACCCACCGGCTCACGGGCCGTCTCC
	GCGGGAGACCTCCACACCCAGCGCCCCAGTGTCCTCCACCCGCCACACCCGGACACAAGCCGCGGAGTCAGGAAGCCCAG
	TGGACGCTACGCTCAGAGACTGCCGGAACCACACTCACCCTCCCAGCCTTTACCTGCTGCAGCCTCCCCTGCGGGGCCCG
	TGGCTCCAGGGAGAGGCCACCTTCACCTGCCTGGCGGTGGGGGATGACCTGCAGGAGGCCCGCATGTCCTGGGCGGTGGC
	CAGGGCGCCCCCCAGCGGGGCGGTGGAGGAGGAACTGCGGGAGGAGCACACCAACGGCTCCCAGAGCCTGAGCAGCCGGC
	TGGCCTTGCCCGTGTCCCTGTGGGCCTCGGGGACCAGCATCGCCTGCACGCTGAGCCTGCCCAACAGGCCGGCCCAGGTG
	GCGTCTGTGGCACCGGGACAGCACGCGGCCACCGCGCCCAGCAGCCTCACTGTCCGCGTCCTGACCGTGCGCCAAGCCGC
	CTCCTGGCTCCTCTGTGAGGTGTCAGGCTTCTCGCCCCCGGACATCCTCCTCACCTGGCTCAAGGGCCGCACGGAGGTGG
	ACCCTGGTGCCTTTGCCACCGCACGCCCCATGGTCCAGCCTGGGAACAGCACGTTCTGGACCTGGAGTGTCCTGCGTGTC
	CTCGCAGCCCAGAGCCCAGGCCCGGCCACCTACACGTGTGTGGTGAGGCATGATGCCTCCCGGAAGCTGTTCAACAGCAG
	CCAGAGCCTGGACGCTGGTCTGGCCACGACGCCCCCACCGCCCCAGAGCCACGAGGAGAGCAGGGGGTACGCCACGGACC
	TGGGGGACGCCACGGACCTGGAGGACACGGGCGGGCTGTGGCCCACGTTTGCCGCCCTCTTCCTGCTCGCTCTGCTCTAC
	AGCGGCTTTGTCACCTTCATCAAGGTGAAG
Ferret_IgE_(Genomic)	GCCTCCAGCCAGGGCCTGTCCGTGTTCCCCCTGACCCCCTGCTGCAAAGGTATGGCCGGCGCCACCTCGGTGAGTCTGGG
	CTGCCTGGTCTCGGGCTACCTCCCAATGCCGGTGACCGTGACCTGGGACACGGGGTCCCTAAACAAGAGTGTCGCCACCG
	TCCCCGCCACCTTCGACCAGACCTCCGGCCTCCACAACGCCATCAGCCAGGTGACCTCCTGGGGCGAGTGGGCCAAACAC
	ACGTTCACCTGCAGCGTGGCTCACGCGGCGTCCCCCGCCATCAACAAGACCTTCAGAGCCTGTGCCATGAACTTCAGCCC
	GCCCTCCGTGAAGCTCTTCCACTCCTCCTGCAACCCGCTGGGCGACACCCACACCACCATCCAGCTCCTGTGTCTCATCT
	CCGGCTACGTCCCGGGGGACATGGAGGTCATCTGGCTGGTGGACGGGCAGAGGGTCACAGACATGTTCTCCTACACCGCG
	CCCGGCACACAGGAGGGCAACGTGACCTCCACCCACAGCGAGCTCAACATCACCCAGGGCGAGTGGGTGTCCCAGAAAAC
	CTACACCTGCCGGGTCAGCTACCAGGGCTTCCACTTTGAGGACCACGCGCTCAAGTGCACAGAGTCCGACCCCCGCGGCG
	TGAGCAGCTACCTGAGCCCGCCCAGCCCTCTGGACCTGTACGTCCACAAGTCGCCCAAGATCACCTGCCTGGTGGTGGAC
	CTGGCCAGCACGGAGGGCATGAGCCTGACCTGGTCCCGGGAGAGCGGGGAGCCCGTGCACCCAGACGGACTGAAGGAGGA
	GACTCAGTTCAACGGGACGGTCAGCGTCACGTCCACCCTGCCGGTGGACACACAGGACTGGGTGGAGGGCGAGGCCTACC
	ACTGCACGGTGAACCACCCAGACCTGCCCAAGAGCCTCGTGCGCTCCATTGCCAAGACCCCTGGCCAGCGAGCGGCCCCG
	GAGGTCCACGTGTTCCTGCCCCCGGAGGAGGACGAGAGCACCACGGACAGGGTCACGCTCACGTGCCTGATCCAGAACTT
	CTTTCCCGCGGACATCTCGGTGCAGTGGCTTCGAAACGACAGGCCCATGCAGGCGGGCCAGCAGGCCACCACGCGGCCCC
	ACAAGGTCCCGGGCGCCAGGCGCGCCTTCTTCGTCTTCAGCCGCCTGGAGGTCAGCCGGCGGGACTGGGAGGAGCAGAAC
	AGCTTCGCCTGCCAAGTGGTGCACGAGGCCCTGCCCAAGTCGCGAGTCTTCAAGAAAACGGTCTCCAAAACCCCGGGTAA
	A
Ferret_IgE_(Transcript)	GCCTCCAGCCAGGGCCTGTCCGTGTTCCCCCTGACCCCCTGCTGCAAAGGTATGGCCGGCGCCACCTCGGTGAGTCTGGG
	CTGCCTGGTCTCGGGCTACCTCCCAATGCCGGTGACCGTGACCTGGGACACGGGGTCCCTAAACAAGAGTGTCGCCACCG
	TCCCCGCCACCTTCGACCAGACCTCCGGCCTCCACAACGCCATCAGCCAGGTGACCTCCTGGGGCGAGTGGGCCAAACAC
	ACGTTCACCTGCAGCGTGGCTCACGCGGCGTCCCCCGCCATCAACAAGACCTTCAGAGCCTGTGCCATGAACTTCAGCCC
	GCCCTCCGTGAAGCTCTTCCACTCCTCCTGCAACCCGCTGGGCGACACCCACACCACCATCCAGCTCCTGTGTCTCATCT
	CCGGCTACGTCCCGGGGGACATGGAGGTCATCTGGCTGGTGGACGGGCAGAGGGTCACAGACATGTTCTCCTACACCGCG
	CCCGGCACACAGGAGGGCAACGTGACCTCCACCCACAGCGAGCTCAACATCACCCAGGGCGAGTGGGTGTCCCAGAAAAC
	CTACACCTGCCGGGTCAGCTACCAGGGCTTCCACTTTGAGGACCACGCGCTCAAGTGCACAGAGTCCGACCCCCGCGGCG
	TGAGCAGCTACCTGAGCCCGCCCAGCCCTCTGGACCTGTACGTCCACAAGTCGCCCAAGATCACCTGCCTGGTGGTGGAC
	CTGGCCAGCACGGAGGGCATGAGCCTGACCTGGTCCCGGGAGAGCGGGGAGCCCGTGCACCCAGACGGACTGAAGGAGGA
	GACTCAGTTCAACGGGACGGTCAGCGTCACGTCCACCCTGCCGGTGGACACACAGGACTGGGTGGAGGGCGAGGCCTACC
	ACTGCACGGTGAACCACCCAGACCTGCCCAAGAGCCTCGTGCGCTCCATTGCCAAGACCCCTGGCCAGCGAGCGGCCCCG
	GAGGTCCACGTGTTCCTGCCCCCGGAGGAGGACGAGAGCACCACGGACAGGGTCACGCTCACGTGCCTGATCCAGAACTT
	CTTTCCCGCGGACATCTCGGTGCAGTGGCTTCGAAACGACAGGCCCATGCAGGCGGGCCAGCAGGCCACCACGCGGCCCC
	ACAAGGTCCCGGGCGCCAGGCGCGCCTTCTTCGTCTTCAGCCGCCTGGAGGTCAGCCGGCGGGACTGGGAGGAGCAGAAC
	AGCTTCGCCTGCCAAGTGGTGCACGAGGCCCTGCCCAAGTCGCGAGTCTTCAAGAAAACGGTCTCCAAAACCCCGGGTAA
	A
Ferret_IgM_(Genomic)	GAGAACCCATCCCCTCCAAACCTCTTCCCCCTCATCACCTGTGAGAGTTTCCAGTCCGATGAGACCCTGGTGGCCATGGG
	CTGTCTGGCCGGGGACTTCCTGCCCGACACCGTCACCTTCTCCTGGACCTACAAGAATGACAGTGAGGTCAGCAGGCAGA
	ACGTCAAGTACTTCCCGTCGGTTCTGAGAGAGGGCAAGTACGTGGCCACCTCCCAGGTGTTCCTGCCGTCCGTCGACGTC
	CTCCAGGGCTCCGAGGACTACCTCACCTGCAAGGTCAAGCACACGAAGGGTAACAAGTCCGTGCACGTGCCCCTCCCAGC
	AGCCGTAGAACTGCCCCCCAACGTGACCGTCTTCATCCCGCCCCGCGACGCCTTCTCTGGCAACGGCCAGCGCACGTCCC
	AGCTCCTGTGCCAGGCCAGGGGCTTCAGCCCCAAGCAGATCTCCGTGTCCTGGTTTCGTGACGGAAAGCCGCTCGCGTCC
	GGCATCGACACTGGCAAGGTGGAGGCCGACGGGAAAGTGTCCGGGACAGTGACCTACAGAGTGCTCAGCACGCTGACCAT
	CACCGAGAGCGCCTGGCTCAGCCAGAGCGTGTTCACCTGCCAAGTGGAGCACAGCGGCGTGACCTCCGAGAGGAACGTGT
	CCTCCGTGTGCACCTCCAACCCAGCCGTGGGCATCAGAGTCTTCACCATCCCCCCGTCCTTTGCCAGCATCTTCCTCACC
	AAGTCGGCCAAGCTGTCCTGCCTGGTCACAGACCTGGGCACCTACGACAGCCTGACCATCACCTGGACACGCCAGAACGG
	CGAGCCTCTGAAAACGCACACCAACATCTCTGAGAGCCACCCCAACATCACCTTCAGCGCCATGGGGGAGGCCACGGTCT
	GTGTGGAGGACTGGGAGTCAGGGGAGCAGTTCACCTGCACGGTGACCCACACGGACCTGCCCTCGCCACTGAAGAAGACC
	ATCTCCAGGCCCAAGGGGGTCCCCAAGCACATGCCGTCTGTGTACGTCCTGCCGCCAAGCCGGGAGCAGCTGAGCCTGCG
	GGAGTCAGCCTCGGTCACCTGCCTGGTGACGGGCTTCTCTCCCCCAGACGTGTTTGTTCAATGGCTGCAGAAGGGGCAGC
	CCGTGCCCCCCAACACCTACGTGACCAGTGCTCCGATGCCTGAGCCGCAAGCCCCCGGCCTCTACTTTGTGCACAGCACC
	CTGACCGTGAGCGAGGAGGACTGGAGCGCCGGCGAGACCTACACCTGTGTAGTCGGCCACGAGGTCCTGCCCCACATGGT
	GACCGAGCGGAGCGTGGACAAGTCCACCGGTAAACCCACCCTCTACAACGTGTCCCTGGTCTTGTCCGACACGGCCGGCA
	CCTGCTAC
Ferret_IgM_(Transcript)	GAGAACCCATCCCCTCCAAACCTCTTCCCCCTCATCACCTGTGAGAGTTTCCAGTCCGATGAGACCCTGGTGGCCATGGG
	CTGTCTGGCCGGGGACTTCCTGCCCGACACCGTCACCTTCTCCTGGACCTACAAGAATGACAGTGAGGTCAGCAGGCAGA
	ACGTCAAGTACTTCCCGTCGGTTCTGAGAGAGGGCAAGTACGTGGCCACCTCCCAGGTGTTCCTGCCGTCCGTCGACGTC
	CTCCAGGGCTCCGAGGACTACCTCACCTGCAAGGTCAAGCACACGAAGGGTAACAAGTCCGTGCACGTGCCCCTCCCAGC
	AGCCGTAGAACTGCCCCCCAACGTGACCGTCTTCATCCCGCCCCGCGACGCCTTCTCTGGCAACGGCCAGCGCACGTCCC
	AGCTCCTGTGCCAGGCCAGGGGCTTCAGCCCCAAGCAGATCTCCGTGTCCTGGTTTCGTGACGGAAAGCCGCTCGCGTCC
	GGCATCGACACTGGCAAGGTGGAGGCCGACGGGAAAGTGTCCGGGACAGTGACCTACAGAGTGCTCAGCACGCTGACCAT
	CACCGAGAGCGCCTGGCTCAGCCAGAGCGTGTTCACCTGCCAAGTGGAGCACAGCGGCGTGACCTCCGAGAGGAACGTGT
	CCTCCGTGTGCACCTCCAACCCAGCCGTGGGCATCAGAGTCTTCACCATCCCCCCGTCCTTTGCCAACATCTTCCTCACC
	AAGTCGGCCAAGCTGTCCTGCCTGGTCACAGACCTGGGCACCTACGACAGCCTGACCATCACCTGGACACGCCAGAACGG
	CGAGCCTCTGAAAACGCACACCAACATCTCTGAGAGCCACCCCAACATCACCTTCAGCGCCATGGGGGAGGCCACGGTCT
	GTGTGGAGGACTGGGAGTCAGGGGAGCAGTTCACCTGCACGGTGACCCACACGGACCTGCCCTCGCCACTGAAGAAGACC
	ATCTCCAGGCCCAAGGGGGTCCCCAAGCACATGCCGTCTGTGTACGTCCTGCCGCCAAGCCGGGAGCAGCTGAGCCTGCG
	GGAGTCAGCCTCGGTCACCTGCCTGGTGACGGGCTTCTCTCCCCCAGACGTGTTTGTTCAATGGCTGCAGAAGGGGCAGC
	CCGTGCCCCCCAACACCTACGTGACCAGTGCTCCGATGCCCGAGCCGCAAGCCCCCGGCCTCTACTTTGTGCACAGCACC
	CTGACCGTGAGCGAGGAGGACTGGAGCGCCGGCGAGACCTACACCTGTGTAGTCGGCCACGAGGTCCTGCCCCACATGGT
	GACCGAGCGGAGCGTGGACAAGTCCACCGGTAAACCCACCCTCTACAACGTGTCCCTGGTCTTGTCCGACACGGCCGGCA
	CCTGCTAC
Ferret_IgG_(Genomic)	NNNNNNNNNNNNNNNNNNNNNNNNNNNNNNNNNNNNNNNNNNNNNNNNNNNNNNNNNNNNNNNNNNNNNNNNNNNNNNNN
	NNNNNNNNNNNNNNNNNNNNNNNNNNNNNNNNNNNNNNNNNNNNNNNNNGGCTCCTTGACCAGCGGTGTGCACACCTTCC
	CGTCTGTCCTGCAGTCCTCGGGCCTCTACTCTCTCAGCAGCATGGTGACCGTGCCCTCCAGCAGGTGGCCCAGCGACACC
	TTCATCTGCACCGTGGCCCACCCAGCCAGTAACACCAAGGTGGACAAGAGAGTGACCCAAAGAGGACCCACTCACACTGA
	CCCATGCAAAAATTGTCCCCAACCTCCAGCATGTGATATGCTCGGAGGACCTTCAGTCTTCATGTTCCCCCCGAAACCCA
	AGGACACCCTCTCCATTTCCCGAACCCCCGAGGTTACATGCATGGTGGTGGACCTGGAAGACCCTGAGGTCCAGATCAGC
	TGGTTCGTGGACAACCAGGAGGTGCACGCGGCCAAGACGAATTCGCGTGAGCAGCAGTTCAACAGCACCTTCCGTGTGGT
	CAGTGTCCTCCCCATCCAGCACCAGGACTGGCTCAAGGGGAAGGTCTTCAAGTGCAAGGTCAACAACAAAGCTCTCCCAT
	CTGCCATTGAGAGGACCATCTCCAAGGCCAGAGGGGAACCCCATCAGCCCAGTGTGTATGTCCTGCCCCCACCCCGGGAC
	GAGATGAGCAGGACCACCATCAGTGTGACCTGCCTGGTCAAAGACTTCTACCCACCTGACATCGATGTGGAGTGGCAGAG
	CAACGGCCGTCAGTTACCAGAGGCCAGTGTCCGAACAACCCCGCCCCAGCTGGATGCGGACGGCAGCTACTTCCTCTACA
	GCAAGCTCTCCGTGGACAAGGCGCACTGGCAGCGGGGAGACACCTTCACGTGTGCGGTGCTGCATGAAGCCCTACACAAC
	CATCACACGCAGAAGTCCATCTCCAAGTCTCCGGGTAAA
Ferret_IgG_(Transcript)	GCTTCCACCACGGCCCCATCGGTTTTCCCACTGGCCCCCAGCTGCGGGGCCACCCCCGGATCCACAGTGGCCCTGGCCTG
	CCTGGTGTCCGGCTACTTCCCTGAGCCTGTCACTGTGTCCTGGAACTCCGGCTCCTTGACCAGCGGTGTGCACACCTTCC
	CGTCTGTCCTGCAGTCCTCGGGCCTCTACTCTCTCAGCAGCATGGTGACCGTGCCCTCCAGCAGGTGGCCCAGCGACACC
	TTCATCTGCACCGTGGCCCACCCAGCCAGTAACACCAAGGTGGACAAGAGAGTGACCCAAGGAGGACCTCCTCACACTGA
	CCCATGCAAAAAATGTCCCCAACCTCCAGCATGTGATATGCTCGGAGGACCTTCAGTCTTCATGTTCCCCCCGAAACCCA
	AGGACACCCTCTCCATTTCCCGAACCCCCGAGGTTACATGCATGGTGGTGGACCTGGAAGACCCTGAGGTCCAGATCAGC
	TGGTTTGTGGACAACCAGGAGGTGCACGCGGCCAAGACGAATTCGCGTGAGCAGCAGTTCAACAGCACCTTCCGTGTGGT
	CAGTGTCCTCCCCATCCAGCACCAGGACTGGCTCAAGGGGAAGGTCTTCAAGTGCAAGGTCAACAACAAAGCTCTCCCAT
	CCCCCATTGAGAGGACCATCTCCAAGGCCAGAGGGGAACCCCATCAGCCCAGTGTGTATGTCCTGCCCCCACCCCGGGAC
	GAGATGAGCAGGACCACCATCAGTGTGACCTGCCTGGTCAAAGACTTCTACCCACCTGACATCGATGTGGAGTGGCAGAG
	CAACGGCCGTCAGTTACCAGAGGCCAGTGTCCGAACAACCCCGCCCCAGCTGGATGCGGACGGCAGCTACTTCCTCTACA
	GCAAGCTCTCCGTGGACAAGGCGCACTGGCAGCGGGGAGACACCTTCACGTGTGCGGTGCTGCATGAAGCCCTACACAAC
	CATCACACGCAGAAGTCCATCTCCCAGTCTCCGGGTAAA
Ferret_IgL_(Genomic)	CAGCCCACGTCCGCACCCTCGGTCACGCTCTTCCCGCCCTCCTCTGAGGAACTCGCCGCCAGCAAGGCCACCCTGGTGTG
	CCTCATCAGTGACTTCTACCCAAGCGGCGTGACGGTGGCCTGGAAGGCAGACGGCAGCCCCGTCACCCAGGGCGTGGAGA
	CCACCAAGCCCTCCAAACAGAGCAACAACAAGTACGCGGCCAGCAGCTACCTGAGCCTGTCGCCTGACAAGTGGCAATCT
	CACAGCAGCTTCAGCTGCCTGGTCACGCACGAGGGCAACACTGTGGAGAAGAAGGTGGTCCCCTCACAGTGCTCT
Ferret IgL_(Transcript)	CAGCCCAMGTCTRCACCCTCGGTCACGCTCTTCCYGMCMTYCTCTGAGGAACTCGCCGCCARCAAGGCCACCCTGGTATG
	CCTCATCAGTGACTTCTACCCTAGCRGCRTGACAGTGGCCTGGAAGGCAGATGGCAGCCCCRTCACCCAAGGCGTGGAGA
	CCACCAAGCCCTCCAAACAGAGCAACAACAAGTACGCGGCCAGCAGCTACCTGAGCCTGTCGCCTGACAAGTGGCAATCT
	CACAGCAGCTTCAGCTGCCTGGTCACGCACGAGGGCAACACCGTGGAGAAGAAGGTGGTCCCCTCACAGTGCTCT
Ferret_IgK_(Genomic)	GGAATGATGCCCAGCCATCCGTCTTTCTGTTCCAACCATCTCCGGACCAGTTACATACCGGCAGTGCCTCTGTCGTGTGC
	ATGCTGAATGGCTTCTACCCCAGAGAAGTCAATGTCAAATGGAAGGTTGATGGTGTTACCAAAAACACAGGCATCCTGGA
	AAGTGTCACAGAACAAGACAGCAAGGACAGCACCTACAGCCTCAGCAGCACCTTGACGATGCCCAGTACGGAGTACCTAA
	GTCATGAGAAGTACTCCTGTGAGGTCACTCACAAGAGCCTGTCCTCCCCTCTTGTCAAGAGCTTCCAAAGGAGCGAGTGC
	CAGTCAGTGGCC
Ferret_IgK_(Transcript)	CGGAATGATGCCCAGCCATCCGTCTTTCTGTTCCAACCATCYCCGGACCAGTTACATASYGGCAGTGCCTCTGTCGTGTG CATGCTGAATGGCTTCTACCCCAGAGAAGTCAATGTCAAATGGAAGGTTGATGGTGTTACCAAAAACACAGGCATCCTGG AAAGTGTCACAGAACAAGACAGCAAGGACAGCACCTACAGCCTCAGCAGCACCTTGACGATGCCCAGTACGGAGTACCTA AGTCATGAGAAGTACTCCTGTGAGGTCACTCACAAGAGCCTGTCCTCCCCTCTTGTCAAGAGCTTCCAAAGGAGCGAGTG CCAGTSAGTGGCC
