# Supplementary material for: Sequencing B cell receptors from ferrets (Mustela putorius furo)
Source: PLoS One. 2020 May 29;15(5):e0233794. doi: 10.1371/journal.pone.0233794 (PMC7259655; doi:10.1371/journal.pone.0233794)
Supplement: S2 Table — (XLSX) [file pone.0233794.s002.xlsx]

## Sheet: Kappa First round primers
Forward Pool	K Primer 01	ATGAGGTTCCCTTCTCAGCTCCTG
	K Primer 02	ATGAGGTTCCCTGCTCAGCTCCTG
	K Primer 03	ATGAGGTTCCCTTCTCAGCTCCTA
	K Primer 04	ATGAGGTTCCCTTTTCAGCTTCTG
	K Primer 05	ATGAGGTTTCCTGCTCAGCTCCTG
	K Primer 06	ATGAAGTTCCCTTCTCAGCTCCTG
	K Primer 07	ATGAGGTTCCCATCTCAGTTCCTG
	K Primer 08	ATGAGGTTCCCTGCTCAGCTCCTT
	K Primer 09	ATGAGGTTCCCTGCTCAGCTCTTT
	K Primer 10	ATGAGGTTCCCTGCTCAGCACTTT
	K Primer 11	ATGAGGTTCCCTGTTCAGCTCCTT
	K Primer 12	ATGAGGTTGCCTTCTCAGTTCCT
	K Primer 13	ATGAGGTTCCCTGTTCAGCTCCTG
	K Primer 14	ATGACTTCCCCTGCTCAGCTCCTG
	K Primer 16	ATGGTGACTCCATCACAGCTTCTT
	K Primer 17	ATGGGAGTCCTGACCCAACTCCTC
	K Primer 18	ATGGGAGTCCCAACCCAACTCCTC
	K Primer 19	ATGGGAATCCTGACCCAACTCCTC
	K Primer 20	ATGGGGTCCGGGACTCCCCTGCTA
	K Primer 21	ATGGTGGGCAAACTCACTGTGGC
Reverse	K R1	CCATCAACCTTCCATTTGACATTGAC

## Sheet: Kappa Second round primers
Forward Pool	K 2D Primer 01	CTCCTGGGGCTGCTGATGCTC
	K 2D Primer 02	CTCCTGGGGCTGCTAATGCTC
	K 2D Primer 03	CTCCTGGGGGTGCTGATGCTC
	K 2D Primer 04	CTCCTGGGGCTGATGATGCTC
	K 2D Primer 05	CTCCTGGGGCTACTGATGCTT
	K 2D Primer 06	CTTCTGGGGCTGCTGATGCTC
	K 2D Primer 07	TTCCTGGGGCTGCTGATGCTC
	K 2D Primer 08	CTCCTGGGGCTAATGATGCTC
	K 2D Primer 10	TTCCTGGGGCTTCTGATGCTC
	K 2D Primer 11	CTCCTTGGGCTGCTAATGCTT
	K 2D Primer 12	CTCTTTGTACTGCTAATGCTTTGG
	K 2D Primer 13	CACTTTGCACTGCTAATGGTTTGG
	K 2D Primer 15	CTCCTTGGGCTCCTCATACTT
	K 2D Primer 16	CTCCTGGGGTTCCTCATGCTC
	K 2D primer 17	CTCCTGGGGCTCTTCATGCTC
	K 2D Primer 18	CTCCTGGGGCTCATGATGCTC
	K 2D Primer 19	CTCCTGGGGCTGCTGATTCTC
	K 2D Primer 20	CTTCTTGGCCTTCTGCTCCTC
	K 2D Primer 21	CTCCTCTGCCTTCTGCTGGC
	K 2D Primer 22	CTCCTCTGTGTTCTGCTGGCC
	K 2D Primer 23	CTGCTATGGATCCTGCTGCTC
	K 2D Primer 24	CTGTGGCTTCGATACTTTTGGTATC
Reverse	K R2D	CAGAGGCACTGCCGGTATGTAAC

## Sheet: Lambda First round primers
Forward Pool	L Primer 01	ATGGCCTGGATTCCTGTCCTCC
	L Primer 02	ATGGCCTGGACTCTTGTTCTCC
	L Primer 03	ATGGCCTGGATTCCAGTCCTCT
	L Primer 04	ATGGCCTGGACCCCTCTTTCAC
	L Primer 05	ATGGCCTGGTCCCCTGTACTC
	L Primer 06	ATGGCCTGGAGCCCTGTCCTC
	L Primer 07	ATGGCCTGGGCCACGGTCCTC
	L Primer 08	ATGGCCTGGACTCCTCTCCTTC
	L Primer 09	ATGGCCTGGACTCCTCTCTCAC
	L Primer 10	ATGGCCTGGAGCCCTCTCTCAC
	L Primer 11	ATGGCCTGGAGCACTCTTTCAC
	L Primer 12	ATGGCCTGGAACCCTCTCTCAC
	L Primer 13	ATGGCCTGGACCCCTCTTCTG
	L Primer 14	ATGGACTGGATCCCTCTCCTAC
	L Primer 16	ATGTACTGGATCCCTCTCCTAC
	L Primer 17	ATGGCCTGGGCCCCACTC
	L Primer 18	ATGGCCTGGTCCCCTCTTCTC
	L Primer 19	ATGGCCTGGACACCTCTCCTC
	L Primer 20	ATGGCCTCGACCCCTCTCCTC
	L Primer 21	ATGGCCTGGACGCCTCTCCT
	L Primer 22	ATGGTCTGGACCCCTCTCCTC
	L Primer 23	ATGGCCTTCATCATAGCTTTGTCCTC
Reverse	L R1	GAAGTCACTGATGAGGCACACCAG

## Sheet: Lambda Second round primers
Forward Pool	L 2D Primer 01	CTTGGATTCCTGGCTCACTGC
	L 2D Primer 02	CTTGGCCTCCTTGCTCACTGC
	L 2D Primer 03	CTCCTTGTCCTCACTCTCTGCAC
	L 2D Primer 04	CTCGGAATCCTGGCTCACTGC
	L 2D Primer 05	CTCGGAGTCCTGGCTCACTG
	L 2D Primer 06	CTTGGCCTCCTTGCTCATTGC
	L 2D primer 07	CTCAGCCTTCTTGCTCACTGC
	L 2D Primer 08	CTCACCCTTCTGGCTCACTGTAC
	L 2D primer 09	CTCACCCTCCTCATTCAGTGC
	L 2D primer 10	CCTCTTGCTCCTCTGTCATTGC
	L 2D primer 11	CTCATGCTCCTCTGTCACTGC
	L 2D primer 12	CCTCATGTTCCTGTCTCACTGC
	L 2D primer 13	CTCATGCTCCTGTCTCACTGC
	L 2D primer 14	CCTCATGCTCCTGTCTCTCTG
	L 2D primer 15	CTCTTCATGCTCCTCTCCCAG
	L 2D primer 16	CACTTCTTGTCCTCACTCTCTGC
	L 2D primer 17	CTCCTCGTCCTCACTCTCTG
	L 2D primer 18	CTCCTCCTCATCACTCTCTGC
	L 2D primer 19	CACTCCTCTTCCTCACTTTCTGC
	L 2D Primer 20	GCTCCCAGTCCTCACTCTTTG
	L 2D primer 21	CTCCCCGTCCTCACTCTATG
	L 2D Primer 22	CTCCCCGTCCTCACTCTCTG
	L 2D prImer 23	CCTTGTTTTCCTGGCTCACTGC
Reverse	L R2D	CTTGCTGGCGGCGAGTTCCTC

## Sheet: Heavy Chain First Round Primers
Forward Pool	Fe III-F1.1	ATGGACTTTGTGCTTGGCTGGGTTTTC
	Fe III-F1.2	ATGGAATTTGTACTTGGCTGGGTTTTCC
	Fe III-F1.3	ATGGAATTTGTGCTGGGCTGGGTTTTCC
	Fe III-F1.4	ATGGAATTTGTATTGGGCTCGGTTTTCC
	Fe III-F1.5	ATGGAGTTTGCACTTGGCTGGGTATTCC
	Fe III-F1.6	ATGGGATTTGTGCTTGGCTGGGTTTTCC
	Fe III-F1.7	ATGGAGCTTGTGCTTGGCTGGGTTTTCC
	Fe III-F1.8	ATGAAGTTTGTGCTTGGCTGGGTTTTCC
	Fe I-F1.1	CTGGAGCTGGAGAATCCTCTTCTTG
	Fe I-F1.2	CTGGAGCTGGAGAATCCTCTTCCT
	Fe II-F1	ATGCAGCTGCTGTGGTCCCTCC
Reverse Pool	FeIgA-R1	CACCAGGCAGGCGATGACCAC
	FeIgG-R1	GAATTCCAAGATACGGTTACAGGCTCG
	FeIgM-R1	CACTGTCATTCTTGTAGGTCCAGGAG
	FeIgD-R1	GTCCTTGTGCCAAGCAGGCCAG
Reverse - Joining	Fe-IGHJ	CTGAGGAGACGGTGACC

## Sheet: Heavy Chain Second Round Primer
Forward Pool	Fe III-F2.1	GCTTGGCTGGGTTTTCCTTGTTGC
	Fe III-F2.2	GCTTGGCTGGGTTTTCCTTGTTGTTC
	Fe III-F2.3	ACTTGGCTGGGTTTTCCTTGTTGCTC
	Fe III-F2.4	GCTCAGCTGGCTTTTCCTTGTTTCAG
	Fe III-F2.5	CACTTGGCTGGGTATTCCTTGTTTCTC
	Fe III-F2.6	ATTGGGCTCGGTTTTCCTTCTTGCTC
	Fe III-F2.7	GCTTGGCTGGGTTTTCCTTCTTGC
	Fe III-F2.8	GCTGGGCTGGGTTTTCCTTCTTGC
	Fe I-F2.1	GGTGGCCCTGGCTACAGGTAAG
	Fe I-F2.2	GGTGGTGTTGGCTACAGGTAGG
	Fe I-F2.3	GGTTGCCCTGGCTACAGGTAAG
	Fe II-F2	CTCCTCTGCCTTCTGGCAGCTC
Reverse Pool	FeIgA-R2	CTTCGTCACAGCTGCAGAGGCTC
	FeIgG-R2	GTAACCTGATACAAGGCATGCAAGGG
	FeIgM-R2	GTCTCATCGGACTGGAAACTCTCAC
	FeIgD-R2	GCCTTGCTTCGGGACTTTACACTC
Reverse - Joining	Fe-IGHJ	CTGAGGAGACGGTGACC
