# Supplementary material for: Sequencing B cell receptors from ferrets (Mustela putorius furo)
Source: PLOS journal article supplement (doi:10.1371/journal.pone.0233794), 2020-05-29
Supplement: S3 (10.1371/journal.pone.0233794.s003) [file journal.pone.0233794.s003]

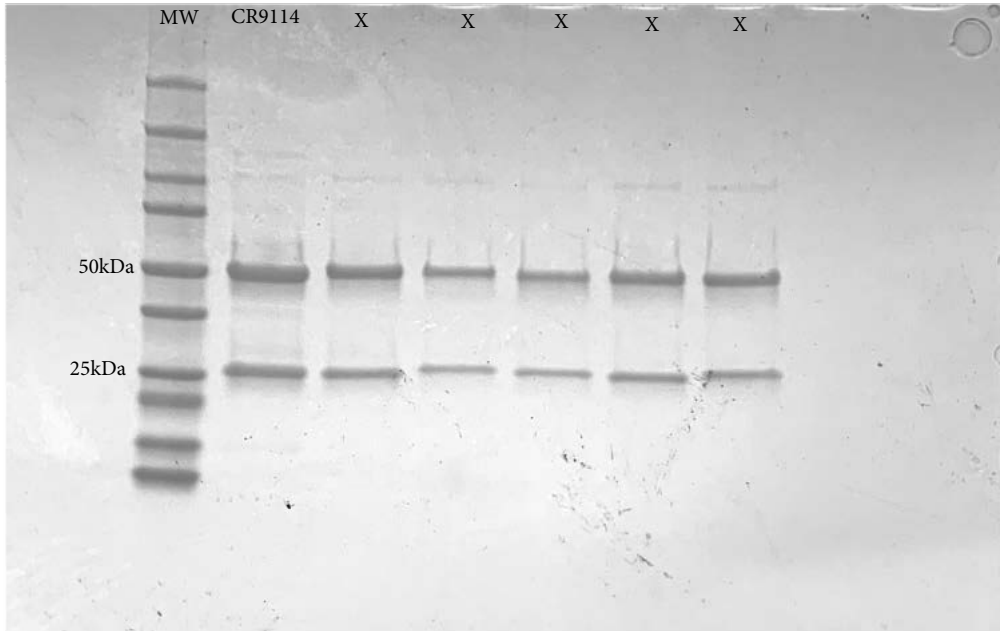

Figure 5A uncropped gel image
